# Supplementary material for: Fluorescence recovery protein: a powerful yet underexplored regulator of photoprotection in cyanobacteria†
Source: Royal Society of Chemistry journal article supplement (doi:10.1039/d0pp00015a), 2020-03-04
Supplement: d0pp00015a1.xlsx [file d0pp00015a1.xlsx]

## Sheet: Supplementary Table 1
Database	Entry	Protein names	Gene names	Organism	Taxonomic lineage	Length	Mass	Sequence
Uniprot	A0A1F4M1Z8	Uncharacterized protein	A2503_02635	Burkholderiales bacterium RIFOXYD12_FULL_59_19	cellular organisms, Bacteria, Proteobacteria, Betaproteobacteria, Burkholderiales, unclassified Burkholderiales, unclassified Burkholderiales (miscellaneous), Burkholderiales bacterium RIFOXYD12_FULL_59_19	106	12275	MPGTTWKDSEKKIARRVFEAALQSELADIMATFKALAANAKEPEDMWKIQAFLAHAQRDIDGKYDYRYSQLELVFGRLLREKRIYEQDLNGIADEKLANILRIAEL
Uniprot	A0A2D3WC42	Uncharacterized protein	CFH82_07460	Sulfurospirillum sp. UBA12182	cellular organisms, Bacteria, Proteobacteria, delta/epsilon subdivisions, Epsilonproteobacteria, Campylobacterales, Campylobacteraceae, Sulfurospirillum, unclassified Sulfurospirillum, Sulfurospirillum sp. UBA12182	115	13640	MPIKSLAWSNSDKKSARVLFELAKKRDYTKLIHNIKNFSLEKEENVWDLKTYLNDQAKEFDTKYDYRYSMLPILFACYIEEGLLSDDELDIFSKSIKEHIQETVKFRAMISSLTD
Uniprot	A0A1G3I7L1	Uncharacterized protein	A3H24_09905	Rhodoferax sp. RIFCSPLOWO2_12_FULL_60_11	cellular organisms, Bacteria, Proteobacteria, Betaproteobacteria, Burkholderiales, Comamonadaceae, Rhodoferax, unclassified Rhodoferax, Rhodoferax sp. RIFCSPLOWO2_12_FULL_60_11	106	12312	MPSTTWKDSEKKIARRVFEAALQSELAEIMAKLKASAANAKWPDDMWEIQAYLAHAQRDIESKYDYRYSQLELVFGRLLRERRIEEQDLNGLADEKLANILRIAGL
Uniprot	A0A369VPE7	Uncharacterized protein	DTW89_04260	Acidovorax sp. BoFeN1	cellular organisms, Bacteria, Proteobacteria, Betaproteobacteria, Burkholderiales, Comamonadaceae, Acidovorax, Acidovorax sp. BoFeN1	106	12255	MHDLKWSNGEKKVAKALFETALQRELQSYIQEFKDRAAKIESPDDLWSIAKQASQKQREIDEKYDFRYSQLIFLFANLLRGGSIQESELTALGEEKAKYIIGIANL
Uniprot	A0A554TWD7	Uncharacterized protein	FFK22_040540	Mycobacterium sp. KBS0706	cellular organisms, Bacteria, Terrabacteria group, Actinobacteria, Actinobacteria (high G+C Gram-positive bacteria), Corynebacteriales, Mycobacteriaceae, Mycobacterium, unclassified Mycobacterium, Mycobacterium sp. KBS0706	109	12638	MPDDKWSPSEKKIARRAYEAALAVALARILAEFKAKAAQVATPSEMWDLEWYLRERRRHIDTLFDYRYSQLTHVFAVLILEGYLDEASLAGLAEDKLDGIRRQVRWAQG
Uniprot	A0A2H9VE27	Uncharacterized protein	BKA76_3354	Bradyrhizobium lablabi	cellular organisms, Bacteria, Proteobacteria, Alphaproteobacteria, Rhizobiales, Bradyrhizobiaceae, Bradyrhizobium, Bradyrhizobium lablabi	112	13084	MSFHDLQWSPSEKKVARRAFDTALELALAKAMAEFKRKANAATTPSEMWEIEDYLRQQRREIDAMFDYRYSQLPLVFARLIREGHLDESLLAGLSEEKRELIRSFLAFAEKG
Uniprot	A0A3M8EQ96	Uncharacterized protein	ED859_11410	Desulfuromonadales bacterium	cellular organisms, Bacteria, Proteobacteria, delta/epsilon subdivisions, Deltaproteobacteria, Desulfuromonadales, unclassified Desulfuromonadales, Desulfuromonadales bacterium	111	13026	MVQEREEVARRAFDGAYRRECAAILNMARTMASSAREPKDLWRIHEFLSEQRIATDNKYDYRYSVLVLVFARLVREGWLSAEELAGLGEEKLEKIRMIWKGYEAVAGRRAR
Uniprot	A0A4Y7BAW9	Uncharacterized protein	EEB15_15570	Ramlibacter sp. WS9	cellular organisms, Bacteria, Proteobacteria, Betaproteobacteria, Burkholderiales, Comamonadaceae, Ramlibacter, unclassified Ramlibacter, Ramlibacter sp. WS9	105	12342	MSDGWSHGEKKLARRVFEEALGAELSEVMAEFRARAASIAEPDDMWQLEDYLREKRIGIERKYDYRYSQLIWVFGNLLREGRIQEAQLTGLSEEKLDSIRRIATF
Uniprot	A0A431JWH4	Uncharacterized protein	EKK55_12020	Rhodocyclaceae bacterium	cellular organisms, Bacteria, Proteobacteria, Betaproteobacteria, Rhodocyclales, Rhodocyclaceae, unclassified Rhodocyclaceae, Rhodocyclaceae bacterium	106	12125	MHELKWTQAEKKAARGLFDVALEREMTDYIARFKASAAAIETPDALWALLREAEQKRRELDERYDFRYSVLVFVFAGLLRRGLIDEAELAALGEGKAHLIAELAKM
Uniprot	A0A2A3APY3	Uncharacterized protein	CK219_21900	Mesorhizobium sp. WSM4313	cellular organisms, Bacteria, Proteobacteria, Alphaproteobacteria, Rhizobiales, Phyllobacteriaceae, Mesorhizobium, unclassified Mesorhizobium, Mesorhizobium sp. WSM4313	109	12908	MNELSWSPSEKKVARAAYDKALERALASIMTEFKRRANAATTPSEMWEVEDYLKEQRRDLDRTFDYRYSQLTVVFATLIRQGYLDEDLLSGLSQEKREEIRRMLAWHKG
Uniprot	A0A4R6ZZ89	Uncharacterized protein	EDE06_12454	Methylocaldum sp. 0917	cellular organisms, Bacteria, Proteobacteria, Gammaproteobacteria, Methylococcales, Methylococcaceae, Methylocaldum, unclassified Methylocaldum, Methylocaldum sp. 0917	105	12507	MDFKWSDSEKKVARRAFDKALEKECASIMAKFKDMAAKVEKPEDLWAVHDYLTKQRRAIDEKYDYRYSQLIFVFARLLGEKWIDEKDLHGLSAEKLQAIQYILSR
Uniprot	A0A3R7X377	Uncharacterized protein	CBC61_003060	Alteromonadaceae bacterium TMED101	cellular organisms, Bacteria, Proteobacteria, Gammaproteobacteria, Alteromonadales, Alteromonadaceae, unclassified Alteromonadaceae, Alteromonadaceae bacterium TMED101	106	12334	MPATDWTSAEETVARQAFELGKQRSVETLISTLQEQSQKLDTPESVWTLHDFLSTERYQYEGRMEFDFSNILFSLADMIKQKLIQYDDLNGLNEVKLSKIKAMSMF
Uniprot	A0A3D6BAJ2	Uncharacterized protein	DHV28_09895	Ignavibacteriales bacterium	cellular organisms, Bacteria, FCB group, Bacteroidetes/Chlorobi group, Ignavibacteriae, Ignavibacteria, Ignavibacteriales, unclassified Ignavibacteriales, Ignavibacteriales bacterium	109	13115	MNIYEMKWTNEEKKVARKAFDNAYQREMDDIKSLLMNKVSQIKTNADIWAIEDFLFEKRKIIDSKYDYRYSQLIIVFGRLLSEGYLNEEDISELSEEKRDLIKKSTVNM
Uniprot	A0A3A4WJV3	Uncharacterized protein	C4526_02400	Nitrospiraceae bacterium	cellular organisms, Bacteria, Nitrospirae, Nitrospira, Nitrospirales, Nitrospiraceae, unclassified Nitrospiraceae, Nitrospiraceae bacterium	104	12531	MNDFIWSKAEKKIAKEAFDKAYQRESEKIIKEIKNYKLEKPEDIWSLSEMLNKREKEIDQIYDYRYSQLVMVFAILIKRGLLSIDELKGLSDDKLERIKKIKNL
Uniprot	A0A0A0D309	Uncharacterized protein	P409_21750	Inquilinus limosus MP06	cellular organisms, Bacteria, Proteobacteria, Alphaproteobacteria, Rhodospirillales, Rhodospirillaceae (purple nonsulfur bacteria), Inquilinus, Inquilinus limosus, Inquilinus limosus MP06	110	12872	MPDRKWSPSEKKIARRAYDAALGVALARILAEFKAKAAQAATPSEMWDLEDYLRRQRRHIDTLFDYRYSQLTFVFAAAIREGYMDESSLAGLSEEKLEPIRRLLRSWMEE
Uniprot	M5EZQ5	Uncharacterized protein	MESS2_1480072	Mesorhizobium metallidurans STM 2683	cellular organisms, Bacteria, Proteobacteria, Alphaproteobacteria, Rhizobiales, Phyllobacteriaceae, Mesorhizobium, Mesorhizobium metallidurans, Mesorhizobium metallidurans STM 2683	112	13269	MNYGEPRWSPSEKKVARGAFDAALETVLDKTMAELKRKASAATIHSDMWDIEDYLRQQRRKLDEMFDYRYSQLPFVFARLIREGYLDENLLVGLSDDKWKEIRSFLTWAAKE
Uniprot	N6ZU45	Uncharacterized protein	C667_05984	Thauera phenylacetica B4P	cellular organisms, Bacteria, Proteobacteria, Betaproteobacteria, Rhodocyclales, Zoogloeaceae, Thauera, Thauera phenylacetica, Thauera phenylacetica B4P	106	12185	MHELKWTQAEKKAARSLFDVALEREMTDYIARFKASAATIETPDALWALLREAEQKRLELDERYDFRYSVLVFVFAGLLRRGLIDEAELAALGEGKAHRIAELAKM
Uniprot	A0A2G2MUL2	Uncharacterized protein	COB07_08025	Sulfurovum sp.	cellular organisms, Bacteria, Proteobacteria, delta/epsilon subdivisions, Epsilonproteobacteria, unclassified Epsilonproteobacteria, Sulfurovum, unclassified Sulfurovum, Sulfurovum sp.	108	12749	MEEKWTKSQKVHARELFDLALGREYAELIDKINTTKIETPDDVWDLHDMLGKKRKELNGKYDYRYSQLMFVFAQLVRGGYLSLKELEPIGKEKQASIEKMVNFKGFET
Uniprot	A0A257CEQ6	Uncharacterized protein	CFE46_11470	Burkholderiales bacterium PBB6	cellular organisms, Bacteria, Proteobacteria, Betaproteobacteria, Burkholderiales, unclassified Burkholderiales, unclassified Burkholderiales (miscellaneous), Burkholderiales bacterium PBB6	105	11890	MSNEWSASEKKIARRVFDAALNQELADVLQVFKAMAANAADAEAMWATEEFLSTARREIDAKYDFRYSQLHMVFGKLLREGRIAEADIAGLSDDNLNKILRCAEF
Uniprot	A0A011QSW1	Uncharacterized protein	AW12_00603	Candidatus Accumulibacter sp. BA-94	cellular organisms, Bacteria, Proteobacteria, Betaproteobacteria, unclassified Betaproteobacteria, Candidatus Accumulibacter, unclassified Candidatus Accumulibacter, Candidatus Accumulibacter sp. BA-94	106	12387	MQHSTWTEAEKKIARRVFNAALQRELVQVMAEFKRRAAGASDPDDMWSVQEYLAETRRQIDTKYDFRYSQLLIVFGRLLRENSIEEGDLSGLSDEKLRYVRSVASL
Uniprot	A0A349A6I1	Uncharacterized protein	DCS11_09695	Syntrophus sp. (in: Bacteria)	cellular organisms, Bacteria, Proteobacteria, delta/epsilon subdivisions, Deltaproteobacteria, Syntrophobacterales, Syntrophaceae, Syntrophus, Syntrophus sp. (in: Bacteria)	117	13652	MTMNLHEMKWSKTEKEAARRAFERAYLKECAAITAKIREMAATASEPEDLWRIQDLPARERRQTDEKYDYRYSVLLFVFARLFYEGWIADADLQGLSDDKIEAIRYLQTGSAGYEAG
Uniprot	A0A1F4KH11	Uncharacterized protein	A3F78_14070	Burkholderiales bacterium RIFCSPLOWO2_12_FULL_61_40	cellular organisms, Bacteria, Proteobacteria, Betaproteobacteria, Burkholderiales, unclassified Burkholderiales, unclassified Burkholderiales (miscellaneous), Burkholderiales bacterium RIFCSPLOWO2_12_FULL_61_40	106	12417	MHDLKWSESEKKLSRRVFEAALQAELADITAKFKAKAAAVTTPDEMWAVREFLAKHQREIEQKYDYRYSQLILALARLVREGRIAEEQLHGLSEEKLSYIRHMVSL
Uniprot	A0A286D3A8	Uncharacterized protein	SAMN06296416_102268	Pseudoxanthomonas wuyuanensis	cellular organisms, Bacteria, Proteobacteria, Gammaproteobacteria, Xanthomonadales, Xanthomonadaceae, Pseudoxanthomonas, Pseudoxanthomonas wuyuanensis	106	12384	MYDFKWSDSEKKLSRRVFDAALQAELAEIVADFKAKASAITTAREMWPLEQFLAQSAREIDRKYDYRYSRLIGVFATLLREGRISEEQLQGLSEEKRCCIRRLASL
Uniprot	A0A0R3BRH3	Uncharacterized protein	AOQ73_30970	Bradyrhizobium pachyrhizi	cellular organisms, Bacteria, Proteobacteria, Alphaproteobacteria, Rhizobiales, Bradyrhizobiaceae, Bradyrhizobium, Bradyrhizobium pachyrhizi	110	12890	MYRDLQWSPAEKKIARKAYDSAVECALAKVMVEFKSRAVAAATPSEMWEVGEYLHQRRRELDEMFDYRYSQLPLVFARLIREQHLDEALLAGLSDEKRQVIRSILSLAER
Uniprot	A0A090D9H1	Uncharacterized protein	MPL3356_110057	Mesorhizobium plurifarium	cellular organisms, Bacteria, Proteobacteria, Alphaproteobacteria, Rhizobiales, Phyllobacteriaceae, Mesorhizobium, Mesorhizobium plurifarium	112	12915	MSSNESRWSPSEKKIARRAFDAALEMALGKTMAELKSKTGAMTAPSDLWEIEDYLRQQRRKIDQLFDYRYSQLIVVFGALIQEGYLDESQLSGLSDDKRAEIRHFLAWHAEA
Uniprot	A0A2A6NNW4	Uncharacterized protein	CO675_13095	Bradyrhizobium sp. C9	cellular organisms, Bacteria, Proteobacteria, Alphaproteobacteria, Rhizobiales, Bradyrhizobiaceae, Bradyrhizobium, unclassified Bradyrhizobium, Bradyrhizobium sp. C9	110	12677	MFHHLKWSPAEKKIAREAYDAALQCALAKLMAEFKSKAGAVATPSEMWEVGDYLHQQRREIGEMFDYRYSQLPLVFARLIREQHLDEALLAGLSDEKRRIIRSILSSAAR
Uniprot	A0A451A0M9	Uncharacterized protein	BECKTC1821D_GA0114238_11086 BECKTC1821F_GA0114240_10352	Candidatus Kentron sp. TC	cellular organisms, Bacteria, Proteobacteria, Gammaproteobacteria, unclassified Gammaproteobacteria, Candidatus Kentron, unclassified Candidatus Kentron, Candidatus Kentron sp. TC	112	13135	MIGTQFKWSRTEKVLARRVFDKAYKREMEDLTNGVRAMLADNADGRAIWRIQECLSEQRYATDNKYDYRYSVLISVFGRLLGEGRIHATDIEGLGEDKLEQIRSIADFIRKR
Uniprot	A0A1E7GB31	Uncharacterized protein	BGV40_10895	Methanosarcina sp. Ant1	cellular organisms, Archaea, Euryarchaeota, Stenosarchaea group, Methanomicrobia, Methanosarcinales, Methanosarcinaceae, Methanosarcina, unclassified Methanosarcina, Methanosarcina sp. Ant1	110	12924	MIETEWSKQEKEITHRAFSAAYERECISIAHKALKMMAEINEPSDIGEIHDYLTDKRKVTDQKYDFRYSVLLFVFARLICEGWVREEDLDGLSGKKLQEIRRIVELISGI
Uniprot	A0A109K0E2	Uncharacterized protein	AS156_34710	Bradyrhizobium macuxiense	cellular organisms, Bacteria, Proteobacteria, Alphaproteobacteria, Rhizobiales, Bradyrhizobiaceae, Bradyrhizobium, Bradyrhizobium macuxiense	111	12898	MWGDLKWSASEKKAARRAYDAALDVALASVLAEFKRLAAAAAAPEDLWKIEDYLRRQRREIDEMFDYRYSQLPLVFARLIREGYLDESLLAGLSDEKREIIRSFLTQAARR
NCBI Reference Sequence	WP_157549365.1	hypothetical protein	ISF6_RS26460	Ideonella sakaiensis strain 201-F6	cellular organisms, Bacteria, Proteobacteria, Betaproteobacteria, Burkholderiales, Ideonella.	108	12670	MSATEWTNRDKKIARAAFDAALKRELDALIIEFKARAARTEDVESLWKVSDWLERKRKEIDRVYDFRYSQLIFVFARLVERGVLDMSELEGLAETKLAEIDYLVRGPD
NCBI Reference Sequence	WP_090502053.1	hypothetical protein	BM315_RS14195	Pseudomonas borbori strain DSM 17834	cellular organisms, Bacteria, Proteobacteria, Gammaproteobacteria, Pseudomonadales, Pseudomonadaceae, Pseudomonas	106	12424	MHDLKWSAAEKKLAHHVFEAALTTELAEIMADFKARAAAITQPQEIWPLQEYLARKQREIDRKYDYRYSQLLFVFGQLIREERVQEAQLAGLSEEKLGYIRRSASL
NCBI Reference Sequence	WP_028454816.1	hypothetical protein	C515_RS0106090	Chitinilyticum litopenaei DSM 21440	cellular organisms, Bacteria, Proteobacteria, Betaproteobacteria, Neisseriales, Chromobacteriaceae, Chitinilyticum	116	13502	MPDMNWSNTEKKLARHLFELALQRKFAALMTEFRTRAAQASEPEDLWNIERFLRDARREIDERFDYRYSRLIVLFGCLLGEGLIEEQELAGLAAGKIAEIRHIASFRQKSCTPVAD
NCBI Reference Sequence	WP_028603409.1	hypothetical protein	G518_RS0115970	Ottowia thiooxydans DSM 14619	cellular organisms, Bacteria, Proteobacteria, Betaproteobacteria, Burkholderiales, Comamonadaceae, Ottowia	106	12425	MSNFNWSASEKKIARRVYDEALHAELAEVMAEFKEKAAAAASPDDMWAVEEYLERKRREIDRKYDYRYSQLTFVFGYLLREGRIQEAQLTGLAEDRLSNIRLIASL
NCBI Reference Sequence	WP_157467415.1	hypothetical protein	Q363_RS23335	Edaphobacter aggregans DSM 19364	cellular organisms, Bacteria, Acidobacteria, Acidobacteriales, Acidobacteriaceae, Edaphobacter	120	13938	MANSPDSAAQNVIPMYELKWSHAEKTVARRAFDLALGKELEALLQEAKGRAARIEEPSELWDLESWLTERRREIDRRYDYRYSILPLVFAQLLRDGRLTEDDLHGLGQEKLDLIRRASAI
NCBI Reference Sequence	WP_026609736.1	hypothetical protein	METSZ_RS0107510	Methylocaldum szegediense O-12	cellular organisms, Bacteria, Proteobacteria, Gammaproteobacteria, Methylococcales, Methylococcaceae, Methylocaldum	105	12553	MRFKWSDSEKKVARRAFDKALEKEYAAIIAKFKDMAAKAEKPEDLWAVHNYLTKQQRALDEKYDYRYSELILVFARLLSEKWIDEKDLNGLNPEKLQAIRNLLSW
NCBI Reference Sequence	WP_157119343.1	hypothetical protein	ALA01S_RS28355	Azohydromonas lata NBRC 102462	cellular organisms, Bacteria, Proteobacteria, Betaproteobacteria, Burkholderiales, Alcaligenaceae, Azohydromonas	101	11835	MDQCREKIARRVFDVALQRELAEVMETFKIRAASAKEPGDLWNIEEFLTQSRHTIDQKYDFRYSQLIIVFGRLVREGRIFMSDLAGLSEEKIQLIERVAAV
NCBI Reference Sequence	WP_057851531.1	hypothetical protein	CP49_RS18030	Bradyrhizobium valentinum strain LmjM3	Bacteria, Proteobacteria, Alphaproteobacteria, Rhizobiales, Bradyrhizobiaceae, Bradyrhizobium	111	12934	MLRDLKWSPSEKKIARRAFDTALKSALAEVMAEFKQKADAASTPSDMWEVEDYLRQQRREIDETFDYRYSQLPLVFARLIREGRLDESLLSGLSEEKREIIRSFLAFAAKG
NCBI Reference Sequence	WP_157863646.1	hypothetical protein	MCON_RS15960	Methanothrix soehngenii GP6	cellular organisms, Archaea, Euryarchaeota, Stenosarchaea group, Methanomicrobia, Methanosarcinales, Methanotrichaceae, Methanothrix	116	13354	MCARAYRAAYERECTVIAERVPRMASGIREPAGLWRIHNFLTEKRNETDEKYDCSYSLLLWVFSRLMVEGGISEDDLRCLMKALLTAHSTLKFDSGTQCARQGPPQSQRSRQVRHS
NCBI Reference Sequence	WP_085121454.1	hypothetical protein	B9O00_RS05055	Tistlia consotensis USBA 355	cellular organisms, Bacteria, Proteobacteria, Alphaproteobacteria, Rhodospirillales, Rhodospirillaceae, Tistlia	110	12930	MRDLKWSGSEKKVARRAFDQAAEAVFAELLAEFRRRAAAVAEPADLWELERHLRQQRRALEELLDFRYSQLPFVFARLIHEGHLDEAQLAGLAEEKLELVRSYLALLRRR
GenBank	AZO44551.1	hypothetical protein	EJ076_27380	Mesorhizobium sp. M7D.F.Ca.US.005.01.1.1	cellular organisms, Bacteria, Proteobacteria, Alphaproteobacteria, Rhizobiales, Phyllobacteriaceae, Mesorhizobium	114	13341	MMDSRESWSASEKKIARNAFDAALEVALARTMAEFKSKANAARLPADMWEIEDYLNEQRRKIDRMFDYRYSQLLFVFPQLIRAGYLDENLLAGLSQDKLDAIRRDIAFAESRQR
GenBank	AMY01522.1	hypothetical protein	A4R29_20035	Mesorhizobium ciceri biovar biserrulae strain WSM1284	cellular organisms, Bacteria, Proteobacteria, Alphaproteobacteria, Rhizobiales, Phyllobacteriaceae, Mesorhizobium	114	12994	MNDFSWSASEKKLARHAFDKALEAALAKTMAEFKSKASAVTAPSQMWELEAYLREQRRDIDRTFDYRYSQLLYVFTHLIRAGYLDEKLLAGLSQDKLDAIRRDLAFAAGRPASG
GenBank	ARP64481.1	hypothetical protein	A9K65_014685	Mesorhizobium sp. WSM1497	cellular organisms, Bacteria, Proteobacteria, Alphaproteobacteria, Rhizobiales, Phyllobacteriaceae, Mesorhizobium	114	13049	MNDFSWSASEKKLARHAFDKALEAALAKTMAEFKSKASAVTVPSQMWELEAYLREQRRDIDRTFDYRYSQLLYVFTHLIRAGCLDEKLLAGLSQDKRDVIRRDLAFAAGRLASG
GenBank	ADV11817.1	hypothetical protein	Mesci_2682	Mesorhizobium ciceri biovar biserrulae WSM1271	cellular organisms, Bacteria, Proteobacteria, Alphaproteobacteria, Rhizobiales, Phyllobacteriaceae, Mesorhizobium	114	12973	MNDSSWSASEKKLARHAFDKALEAALAKTMAEFKSKASAVTVPSQMWELEAYLREQRRDIDRTFDYRYSQLLYVFTHLIRAGCLDEKLLAGLSQDKRDVIRRDLAFAAGRPASG
GenBank	BAV46968.1	Uncharacterized protein	MLTONO_2065	Mesorhizobium loti	cellular organisms, Bacteria, Proteobacteria, Alphaproteobacteria, Rhizobiales, Phyllobacteriaceae, Mesorhizobium	114	13285	MNGFSWSASEKKLARHAFDMALEAALAKTMAEFKRKASAVTQPSEMWELEDYLREERRDIDRMFDYRYSQLIYVLAHLIRLGHLDEKLLAGLSQDKWDAIRRDLAFTARRSASG
GenBank	BBA37575.1	Uncharacterized protein	sS8_5658	Methylocaldum marinum	cellular organisms, Bacteria, Proteobacteria, Gammaproteobacteria, Methylococcales, Methylococcaceae, Methylocaldum	105	12407	MNFKWSDSEKKVARRAFDKALEKECASIMARFKDMAAKVEKPEDLWAVHDYLTKQQRAIDEKYDYRYSQLIFVFARLLGEKWIDEKDLHGLSAEKLQAIQYILSG
GenBank	AZO44551.1	hypothetical protein	EJ076_27380	Mesorhizobium sp. M7D.F.Ca.US.005.01.1.1	cellular organisms, Bacteria, Proteobacteria, Alphaproteobacteria, Rhizobiales, Phyllobacteriaceae, Mesorhizobium	114	13341	MMDSRESWSASEKKIARNAFDAALEVALARTMAEFKSKANAARLPADMWEIEDYLNEQRRKIDRMFDYRYSQLLFVFPQLIRAGYLDENLLAGLSQDKLDAIRRDIAFAESRQR
GenBank	BBB69798.1	hypothetical protein	UNDYM_5545	Undibacterium sp. YM2	cellular organisms, Bacteria, Proteobacteria, Betaproteobacteria, Burkholderiales, Oxalobacteraceae, Undibacterium, unclassified Undibacterium.	116	13926	MHDFKWSDTEKKVARAAYDNALQKELAAIMVRFKELANAVNSPHELWEIEAYLQKARKRIDAKYDYRYSRLPLLLAQLVFQNLVKREDLQKLSQDKLEIIDSLLEKDRNYFYENDE
GenBank	QEE28154.1	hypothetical protein	FTW19_09195	Terriglobus albidus strain ORNL	cellular organisms, Bacteria, Acidobacteria, Acidobacteriales, Acidobacteriaceae, Terriglobus	117	13885	MPSTQDIESIHMRDWRWSQAEKIAARRAFEQALHQDLDTVMRTAKERIAQITKPAELWDIEDWLGDQRRRIDRDYDYRYSVLPIVFAGMIRSGRLTENDLHGIDPAKLDIIRRIASY
GenBank	AOF82422.1	hypothetical protein	BSY238_2201	Methyloversatilis sp. RAC08	cellular organisms, Bacteria, Proteobacteria, Betaproteobacteria, Nitrosomonadales, Sterolibacteriaceae, Methyloversatilis	115	13383	MDPVTWSNSERKIARQAFYTALSREEASLLADFKARAAAAATQDDMWAVYRFLAERDGYMGRKYEFRYSELISLFVLLRAEGWLDEADLAGLRDDKLTMIREGCARWQRHFECGD

## Sheet: Supplementary Table 2
Database	Entry	Protein names	Gene names	Organism	Taxonomic lineage	Length	Mass	Sequence
Uniprot	P74103	Fluorescence recovery protein (FRP)	frp slr1964	Synechocystis sp. (strain PCC 6803 / Kazusa)	cellular organisms, Bacteria, Terrabacteria group, Cyanobacteria/Melainabacteria group, Cyanobacteria, Synechococcales, Merismopediaceae, Synechocystis, unclassified Synechocystis, Synechocystis sp. PCC 6803, Synechocystis sp. (strain PCC 6803 / Kazusa)	109	1237	MLQTAEAPWSQAETQSAHALFRKAYQRELDGLLATVQAQASQITQIDDLWKLHDFLSAKRHEIDGKYDDRQSVIIFVFAQLLKEGLVQAEELTFLAADKQSKIKALARL
Uniprot	K9PYV2	Uncharacterized protein	Lepto7376_2016	Leptolyngbya sp. PCC 7376	cellular organisms, Bacteria, Terrabacteria group, Cyanobacteria/Melainabacteria group, Cyanobacteria, Synechococcales, Leptolyngbyaceae, Leptolyngbya, Leptolyngbya sp. PCC 7376	110	12533	MSTTKSEWSTTEELIAKTAFDMAYRREAAAMMAEAKRQAELAADPNDFWILNDFLSARRHDLDGKYDFRSEARVFVLAQLAKEGWLEISELEGLSIDKLAKIEVLISTLM
Uniprot	A0A1Q4R1J2	Uncharacterized protein	NIES208_15415	Limnothrix rosea IAM M-220	cellular organisms, Bacteria, Terrabacteria group, Cyanobacteria/Melainabacteria group, Cyanobacteria, Synechococcales, Pseudanabaenaceae, Limnothrix, Limnothrix rosea, Limnothrix rosea IAM M-220	108	12304	MPTTKATWSHTEEAIAREAFRVAYAREVESMMAEAKRQAAAASSPDELWELNDFLSARRHYLDGKYDFHPESLIFIFAQLVKEGLLDMAELSGFSADKLSKIRVLTFM
Uniprot	A0A563VQT7	Fluorescence recovery protein	frp H1P_2170008	Hyella patelloides LEGE 07179	cellular organisms, Bacteria, Terrabacteria group, Cyanobacteria/Melainabacteria group, Cyanobacteria, Pleurocapsales, Hyellaceae, Hyella, Hyella patelloides, Hyella patelloides LEGE 07179	109	12616	MLQLNENKSSKTEEKIAKEALKIAYERETSTLIASIRDRASLLTELEELWYVHDLLSTKRHEIDGKYSYNPSTIVFDFARLVKEGWLNLDELKGLKPEMLSKISALARM
Uniprot	A0A3F3KQN7	Uncharacterized protein	CEP08_02800	Cylindrospermopsis raciborskii S05	cellular organisms, Bacteria, Terrabacteria group, Cyanobacteria/Melainabacteria group, Cyanobacteria, Nostocales, Aphanizomenonaceae, Cylindrospermopsis, Cylindrospermopsis raciborskii, Cylindrospermopsis raciborskii S05	111	13028	MGMVQVNDIEWSTTEKELARKAFDLAYEREINALIETVREQAGTITKLDEIWQLHDFLSARRHQIDGKYDYRYSVLIFVFAQLVREGWLHIKDLEGLEVNKIAKVSALTRM
Uniprot	K9EYX4	Uncharacterized protein	Lepto7375DRAFT_0201	Leptolyngbya sp. PCC 7375	cellular organisms, Bacteria, Terrabacteria group, Cyanobacteria/Melainabacteria group, Cyanobacteria, Synechococcales, Leptolyngbyaceae, Leptolyngbya, Leptolyngbya sp. PCC 7375	109	12429	MTQDSDISWSSRDKKIAEEALKKAYEREVAALISYVQEKAKLLTVLEDVWQLHTFLSASRHDIDGKYDDAEPSLAYILSRLIKDGWLDSSELEGLSTDKRAKVTILTRI
Uniprot	T2IGE2	Uncharacterized protein	CWATWH8502_3207	Crocosphaera watsonii WH 8502	cellular organisms, Bacteria, Terrabacteria group, Cyanobacteria/Melainabacteria group, Cyanobacteria, Oscillatoriophycideae, Chroococcales, Aphanothecaceae, Crocosphaera, Crocosphaera watsonii, Crocosphaera watsonii WH 8502	108	12202	MNSNTQQSLDKDQKIAQEALKKAYARETKTLVAEINQKASQITDINDIWALSDYLNSQRYNIEGKYDFGESTSVFVLAQLVKEKWLTLDELSDLTPSTRAKVAALAKM
Uniprot	A0A2T1CVE7	Uncharacterized protein	C7B62_03030	Pleurocapsa sp. CCALA 161	cellular organisms, Bacteria, Terrabacteria group, Cyanobacteria/Melainabacteria group, Cyanobacteria, Pleurocapsales, Hyellaceae, Pleurocapsa, unclassified Pleurocapsa, Pleurocapsa sp. CCALA 161	109	1274	MLETSKNKFSVMEETIAKQALHKAYERETSALIAHVRDRSNAIAELEDLWYLHDLLSTKRYEIDGKYVYNFSTFVFDCATLVKEKWLYLDDLQGLKPEMLSKISALARM
Uniprot	Q3M6D9	Uncharacterized protein	Ava_3842	Trichormus variabilis (strain ATCC 29413 / PCC 7937) (Anabaena variabilis)	cellular organisms, Bacteria, Terrabacteria group, Cyanobacteria/Melainabacteria group, Cyanobacteria, Nostocales, Nostocaceae, Trichormus, Anabaena variabilis, Trichormus variabilis (strain ATCC 29413 / PCC 7937) (Anabaena variabilis)	108	12496	MHVSEAEWTDIEKKIARTAFDQAYKREIEALLKQVQKEASTLVELDGLWQLHDFLSARRHEIEGKYDYQYSALLFVFAGLVKDGWLHVNELEGLSKDKLSKVSALARM
Uniprot	L8N3N1	Uncharacterized protein	Pse7429DRAFT_1147	Pseudanabaena biceps PCC 7429	cellular organisms, Bacteria, Terrabacteria group, Cyanobacteria/Melainabacteria group, Cyanobacteria, Synechococcales, Pseudanabaenaceae, Pseudanabaena, Pseudanabaena biceps, Pseudanabaena biceps PCC 7429	108	12497	MQVMNAGWTQVEEEVARKAFDIAYKREINALIDSVRSKASCLNEIEDMWHLHDFLSVKRHEVDGRYDYNLPMLVFVFAGLIKDGWITVNELEGLNSDKIAKIMALSYM
Uniprot	L8LTI6	Uncharacterized protein	GLO73106DRAFT_00023270	Gloeocapsa sp. PCC 73106	cellular organisms, Bacteria, Terrabacteria group, Cyanobacteria/Melainabacteria group, Cyanobacteria, Oscillatoriophycideae, Chroococcales, Chroococcaceae, Gloeocapsa, unclassified Gloeocapsa, Gloeocapsa sp. PCC 73106	109	12749	MMQLTETSWTETEKTVAEQAFTTAYARETNALIKTVCEQSTEIQQLEDIWRLHDFLSARRHDLDGKYDYRYSSLIFVFAQLLKQGWLTLEDLQGLTPEKLKKISALARM
Uniprot	A0A073CCR0	Uncharacterized protein	A19Y_0174	Planktothrix agardhii NIVA-CYA 126/8	cellular organisms, Bacteria, Terrabacteria group, Cyanobacteria/Melainabacteria group, Cyanobacteria, Oscillatoriophycideae, Oscillatoriales, Microcoleaceae, Planktothrix, Planktothrix agardhii (Oscillatoria agardhii), Planktothrix agardhii NIVA-CYA 126/8	109	12688	MMQVNEIEWSEAEKEVAKAAFDMAYKREINALIDEVRKQSSEIVEIDDIWRLHDFLSARRHNIDGKYDYEYSGLIFVFASLVKDGWLHLNELDGLNTNKLTKIAAIARI
Uniprot	A0A328IFN0	Uncharacterized protein	C6Y22_05870	Hapalosiphonaceae cyanobacterium JJU2	cellular organisms, Bacteria, Terrabacteria group, Cyanobacteria/Melainabacteria group, Cyanobacteria, Nostocales, Hapalosiphonaceae, unclassified Hapalosiphonaceae, Hapalosiphonaceae cyanobacterium JJU2	109	12932	MKQVSDTEWSKTEKEVAQQAFERAYEREIDTLIKEVREKASAIADLDHIWHLHNFLSARRHEIDGKYDYRYSVLIFVFARLVKEGWLHLDELKGLNTDKLTKITALTRI
Uniprot	B5W3T4	Uncharacterized protein	AmaxDRAFT_3432	Arthrospira maxima CS-328	cellular organisms, Bacteria, Terrabacteria group, Cyanobacteria/Melainabacteria group, Cyanobacteria, Oscillatoriophycideae, Oscillatoriales, Microcoleaceae, Limnospira, Limnospira maxima (Arthrospira maxima), Arthrospira maxima CS-328	106	12244	MSEINWSEQDKNAAVDALHKAYEREVKILIDEVKQKAFNLTEIDEVWKLHDFLSARRHDIDGKYDYRDAASVFVLATLVKQGWLSLEELQVLGQDKLAKISALTRL
Uniprot	A0A2P7EGI6	Uncharacterized protein	C7K08_02950	Synechococcus lacustris	cellular organisms, Bacteria, Terrabacteria group, Cyanobacteria/Melainabacteria group, Cyanobacteria, Synechococcales, Synechococcaceae, Synechococcus, Synechococcus lacustris	109	12507	MVDTVLEGWTTSEQTIAKSAFDQAYARSIDQLIKSVRSKSEQLDTAETIWALHDYLSIQRHTIEGRFDFRPEGILFVFARLVKDELLKLSELDGLDKEKLTKIAAMARF
Uniprot	A0A2W4UCK8	Uncharacterized protein	DCF25_10615	Leptolyngbya foveolarum	cellular organisms, Bacteria, Terrabacteria group, Cyanobacteria/Melainabacteria group, Cyanobacteria, Synechococcales, Leptolyngbyaceae, Leptolyngbya, Leptolyngbya foveolarum	108	12454	MQQAEVQWSPEEKKIAQAALEGARDREIEAVIKSIRENAGLISQIEDVWQLHDYLSAKRHEIDGKYDDRESFLMFTLSRLIKDGLIDLVDLSGLEPEKQSKVKILTRM
Uniprot	A0A2A2TND2	Uncharacterized protein	CK510_04595	Calothrix elsteri CCALA 953	cellular organisms, Bacteria, Terrabacteria group, Cyanobacteria/Melainabacteria group, Cyanobacteria, Nostocales, Rivulariaceae, Calothrix, Calothrix elsteri, Calothrix elsteri CCALA 953	108	12743	MQVIDTEWSKIEQEVAKEAFDRAYKREIKSLMALVQEKAGAIAQLDDMWSLHDFLSAKRHDIDGKYDYRYSFLIFVFARLVKEEWLDINELQGLTKEKLAKILALSRM
Uniprot	A0A1Z4T0E3	Uncharacterized protein	NIES4105_61020	Calothrix sp. NIES-4105	cellular organisms, Bacteria, Terrabacteria group, Cyanobacteria/Melainabacteria group, Cyanobacteria, Nostocales, Rivulariaceae, Calothrix, unclassified Calothrix, Calothrix sp. NIES-4105	108	12698	MQATDIQWSKTEQEVAKAAFDKAYEREISALIEQVHQQAATITQLDEIWVLHDYLSARRHDIDGKYDYKYSVLIFVFARLLKEGWLHLDELEGLEKEKLKKVTALSRM
Uniprot	A0A1Z4JH45	Uncharacterized protein	NIES2135_29140	Leptolyngbya boryana NIES-2135	cellular organisms, Bacteria, Terrabacteria group, Cyanobacteria/Melainabacteria group, Cyanobacteria, Synechococcales, Leptolyngbyaceae, Leptolyngbya, Leptolyngbya boryana (Plectonema boryanum), Leptolyngbya boryana NIES-2135	107	12574	MSEIHWTQTEQEISRSAFDRAYQREIQALMQDVAERANQVSEVSDLWQFHDFLSARRHEIDGKYDYRDSVLIFVFAQLVREKWLDLNELKGLAADKLAKISALVRMG
Uniprot	K9RT87	Uncharacterized protein	Syn6312_1322	Synechococcus sp. (strain ATCC 27167 / PCC 6312)	cellular organisms, Bacteria, Terrabacteria group, Cyanobacteria/Melainabacteria group, Cyanobacteria, Synechococcales, Synechococcaceae, Synechococcus, unclassified Synechococcus, Synechococcus sp. (strain ATCC 27167 / PCC 6312)	109	12565	MLQIKDTGWSEKEKAVAQASLKLAREREIASLMLEVSHQANGVTTLDDLWKLHDFLSARRYDIEGKYEDEYSVLIFVLARLVKEGWLLVEELKGLEEDKLTKVTVLARM
Uniprot	A0A1J1LVU6	Uncharacterized protein	PL921480202	Planktothrix tepida PCC 9214	cellular organisms, Bacteria, Terrabacteria group, Cyanobacteria/Melainabacteria group, Cyanobacteria, Oscillatoriophycideae, Oscillatoriales, Microcoleaceae, Planktothrix, Planktothrix tepida, Planktothrix tepida PCC 9214	109	12642	MMQVNEIEWSEAEKEVAKAAFDTAYQREIKALIDEVRKQSSAIVEIDDIWRLHDFLSARRHNIDGKYDYEYSGLIFIFASLVKEGWLHLNELDGLNTNKLTKIAAIARI
Uniprot	K9YKB0	Uncharacterized protein	Cyast_0565	Cyanobacterium stanieri (strain ATCC 29140 / PCC 7202)	cellular organisms, Bacteria, Terrabacteria group, Cyanobacteria/Melainabacteria group, Cyanobacteria, Oscillatoriophycideae, Chroococcales, Cyanobacteriaceae, Cyanobacterium, Cyanobacterium stanieri, Cyanobacterium stanieri (strain ATCC 29140 / PCC 7202)	109	12748	MSTTITTGWTETEIEISERVLKKAYERETKTLVEKVKNKIENLQQVEELWQVHDLLSSKRYDLDGKYDNREPMLVFTFAQLLKEGWINLEELTGLEKGKLAQISSLARM
Uniprot	A0A3S1A3G2	Uncharacterized protein	PCC6912_15610	Chlorogloeopsis fritschii PCC 6912	cellular organisms, Bacteria, Terrabacteria group, Cyanobacteria/Melainabacteria group, Cyanobacteria, Nostocales, Chlorogloeopsidaceae, Chlorogloeopsis, Chlorogloeopsis fritschii, Chlorogloeopsis fritschii PCC 6912	108	12694	MQASETEWTDIEKKIARTAFEQAYKREIDALLKQVQKEASTLVDLNDIWRLHDFLSAKRHEIEGKYDYQYSVLLFIFAELIKEGWLSLNELKGLDQDKLSKVAVLSRM
Uniprot	A0A1Q8ZGW6	Uncharacterized protein	BST81_06050	Leptolyngbya sp. 'hensonii'	cellular organisms, Bacteria, Terrabacteria group, Cyanobacteria/Melainabacteria group, Cyanobacteria, Synechococcales, Leptolyngbyaceae, Leptolyngbya, Leptolyngbya sp. 'hensonii'	109	12655	MMQVNDVHWSDAEQNIAQQAFHNAYERETQALIQEIQEHASRVSTLEDIWQLHNFLSARRHEIDGKYDYSYPALLFVFATLVKQGWLHLDELTGLDKGKLAKIASLARM
Uniprot	A0A2T1LUR3	Uncharacterized protein	C7H19_17240	Aphanothece hegewaldii CCALA 016	cellular organisms, Bacteria, Terrabacteria group, Cyanobacteria/Melainabacteria group, Cyanobacteria, Oscillatoriophycideae, Chroococcales, Aphanothecaceae, Aphanothece, Aphanothece hegewaldii, Aphanothece hegewaldii CCALA 016	109	1306	MMQVSEITWTETEKEIAQQAFKKAYDREIMALIDYVQDQSDKIAKIEDVWYLHDFLSARRHQIDGKYDYRYSVLLFVFAQLLKEGWLYLEDIQGLEREKVSKISALSRM
Uniprot	K9P3P2	Uncharacterized protein	Cyagr_0841	Cyanobium gracile (strain ATCC 27147 / PCC 6307)	cellular organisms, Bacteria, Terrabacteria group, Cyanobacteria/Melainabacteria group, Cyanobacteria, Synechococcales, Synechococcaceae, Cyanobium, Cyanobium gracile, Cyanobium gracile (strain ATCC 27147 / PCC 6307)	108	12438	MVSAVLEWTDQEQQVARRAFDKAHSRAAIGIIRAVQAHASRMDSVEECWKLHDFLSIQRHEIEGRFDFRLPGLLFVFASLVKDGLLQVEELEGLERDKLNKITAMSRM
Uniprot	B7K963	Uncharacterized protein	PCC7424_4468	Gloeothece citriformis (strain PCC 7424) (Cyanothece sp. (strain PCC 7424))	cellular organisms, Bacteria, Terrabacteria group, Cyanobacteria/Melainabacteria group, Cyanobacteria, Oscillatoriophycideae, Chroococcales, Aphanothecaceae, Gloeothece, Gloeothece citriformis, Gloeothece citriformis (strain PCC 7424) (Cyanothece sp. (strain PCC 7424))	108	12525	MLHTEISWSDTEKKIADKAFKKAYDLETATLISQIRSKASEIVEVDDLWHLHDLLSARRHQLDGKYDHRDSVLIFVFAQLVKEGWLHLDDLKGLQPEKLAKITALTRM
Uniprot	A0A0T7BSY5	Uncharacterized protein	IJ00_13830	Calothrix sp. 336/3	cellular organisms, Bacteria, Terrabacteria group, Cyanobacteria/Melainabacteria group, Cyanobacteria, Nostocales, Rivulariaceae, Calothrix, unclassified Calothrix, Calothrix sp. 336/3	108	12499	MKVNEISWSDVEQEVAQTAFQIAYEREINALIQEVRGNAAQVSQLEDIWCLHNFLSARRHEIDGKYDYNYSVLIFVFATLVKQGWLHLEELKGLDKDKIAKIGSLARM
Uniprot	A0A081GJB9	Uncharacterized protein	ER33_12535	Cyanobium sp. CACIAM 14	cellular organisms, Bacteria, Terrabacteria group, Cyanobacteria/Melainabacteria group, Cyanobacteria, Synechococcales, Synechococcaceae, Cyanobium, unclassified Cyanobium, Cyanobium sp. CACIAM 14	108	12275	MGTVVAGWTELEQQIARRAFDQAHARAVAGIIRAVQAHASRIECAEECWKLHDFLSIQRHEIEGRFDFRLPGLLFVFASLVKDGLLQMEELEGLDREKLNKIAAMSRL
Uniprot	A0A2P7MYD7	Uncharacterized protein	C7K55_04580	Cyanobium usitatum str. Tous	cellular organisms, Bacteria, Terrabacteria group, Cyanobacteria/Melainabacteria group, Cyanobacteria, Synechococcales, Synechococcaceae, Cyanobium, Cyanobium usitatum, Cyanobium usitatum str. Tous	109	12552	MMDTMLEGWTDTEQAVAREAFDRAYTRAVQQLVAQVRAKADELEDAETVWQLHDYLSIERHTIEGRFDFRLDGILFVFASLVKDSLLQLDELNGLEAEKLAKIVAMSRF
Uniprot	A0A2W4WBC1	Uncharacterized protein	DCF19_14660	Pseudanabaena frigida	cellular organisms, Bacteria, Terrabacteria group, Cyanobacteria/Melainabacteria group, Cyanobacteria, Synechococcales, Pseudanabaenaceae, Pseudanabaena, Pseudanabaena frigida	108	12461	MQAINAEWTSTEEDIARRAFDIAHKREITSLIDLVRAKVNSLTEIEDIWRLHDFLSVKRHEIDGRYDYRLSILVFVFAGLVKDGWLNINELEGLNTDKIAKISALACM
Uniprot	U7QJA4	Uncharacterized protein	M595_2873	Lyngbya aestuarii BL J	cellular organisms, Bacteria, Terrabacteria group, Cyanobacteria/Melainabacteria group, Cyanobacteria, Oscillatoriophycideae, Oscillatoriales, Oscillatoriaceae, Lyngbya, Lyngbya aestuarii, Lyngbya aestuarii BL J	109	12694	MIPVSDIEWSTAEKEIARQAFKKAYQREITALIQVVREQAGEITKLDDIWLLHDFLSARRHDIDGKYDHRDSLLIFTFAQLVKEGWLHLDELKGLDAEKISKVSVLTRM
Uniprot	A0A0D6KMZ1	Uncharacterized protein	FDUTEX481_08603	Tolypothrix sp. PCC 7601	cellular organisms, Bacteria, Terrabacteria group, Cyanobacteria/Melainabacteria group, Cyanobacteria, Nostocales, Tolypothrichaceae, Tolypothrix, unclassified Tolypothrix, Tolypothrix sp. PCC 7601	108	12628	MKVNEVSWSDLEQEVAQAAFQKAYEREINALIQDVRDNAVQISELEDIWRLHNFLSAKRHEIDGKYDYNYSVLVFVFATLIKQGWLHLDELKGLDQDKLTKIGSLSRM
Uniprot	A0A4D9CDV6	Uncharacterized protein	BLD44_015600	Mastigocladus laminosus UU774	cellular organisms, Bacteria, Terrabacteria group, Cyanobacteria/Melainabacteria group, Cyanobacteria, Nostocales, Hapalosiphonaceae, Mastigocladus, Mastigocladus laminosus (Fischerella sp.), Mastigocladus laminosus UU774	109	12906	MKQVSDVEWSNTEKQVAQQAFERAYEREIDTLIKEVREKASAIADLDHIWQLHNFLSARRHEIDGKYDYRYSVLIFVFARLVKEGWLHLDELKGLNTDKLTKITALTRI
Uniprot	A0A1Z4RRJ7	Uncharacterized protein	NIES4102_21130	Chondrocystis sp. NIES-4102	cellular organisms, Bacteria, Terrabacteria group, Cyanobacteria/Melainabacteria group, Cyanobacteria, Oscillatoriophycideae, Chroococcales, Chroococcaceae, Chondrocystis, unclassified Chondrocystis, Chondrocystis sp. NIES-4102	109	12862	MLQSSETKWSPMEETIAQQALQKAYERETTALIEHIRDRANSINQLEDLWYLHDLLSTKRHEIDGKYHYDQTTIVFDFAKLVKEKWLSIEELTGLKPQIITKISVLARM
Uniprot	A0A1J1L8A9	Uncharacterized protein	PLAN50635	Planktothrix rubescens	cellular organisms, Bacteria, Terrabacteria group, Cyanobacteria/Melainabacteria group, Cyanobacteria, Oscillatoriophycideae, Oscillatoriales, Microcoleaceae, Planktothrix, Planktothrix rubescens	109	12688	MMQVNEIEWSEAEKEVAKAAFDMAYKREINALIDEVRKQSSEIVEIDDIWRLHDFLSARRHNIDGKYDYEYSGLIFVFASLVKDGWLHLNELDGLNTNKLTKIAAIARI
Uniprot	A0A1D9GCB7	Uncharacterized protein	BJP36_32925	Moorea producens JHB	cellular organisms, Bacteria, Terrabacteria group, Cyanobacteria/Melainabacteria group, Cyanobacteria, Oscillatoriophycideae, Oscillatoriales, Oscillatoriaceae, Moorea, Moorea producens, Moorea producens JHB	106	12501	MSESNWSESEKKGAQEAFKKAYEREIETLIDEVKQKGSEISEIDGVWQLHDLLSARRHDIDGKYDYRYSSLIFVFARLLKEGWLDLEELKFLERDKLAKITALSRM
Uniprot	A0A1T4ZE83	Uncharacterized protein	PL11201_40026	Planktothrix sp. PCC 11201	cellular organisms, Bacteria, Terrabacteria group, Cyanobacteria/Melainabacteria group, Cyanobacteria, Oscillatoriophycideae, Oscillatoriales, Microcoleaceae, Planktothrix, unclassified Planktothrix, Planktothrix sp. PCC 11201	109	1265	MMQVNEIEWSEAEKEVAKAAFDMAYKREIKALIDEVRKQSSAIVEIDDIWRLHDFLSARRHNIDGKYDYEYSGLIFIFASLVKEGWLDLNELDGLNTNKLTKIAAIARI
Uniprot	A0A1Z4GMR8	Uncharacterized protein	NIES21_44960	Anabaenopsis circularis NIES-21	cellular organisms, Bacteria, Terrabacteria group, Cyanobacteria/Melainabacteria group, Cyanobacteria, Nostocales, Aphanizomenonaceae, Anabaenopsis, Anabaenopsis circularis, Anabaenopsis circularis NIES-21	108	12972	MQVSEIEWSKTEEEIAKQAFDKAYQREIEAVIQEVRQRSSMMTRADEMWQLHDFLSARRHEIDGKYDYKYSVLIFVFARLIKEGWLHLDELQGLEKDKLTKVAVMTRM
Uniprot	A0A0M0SM91	Uncharacterized protein	AMR41_18610	Hapalosiphon sp. MRB220	cellular organisms, Bacteria, Terrabacteria group, Cyanobacteria/Melainabacteria group, Cyanobacteria, Nostocales, Hapalosiphonaceae, Hapalosiphon, unclassified Hapalosiphon, Hapalosiphon sp. MRB220	109	12822	MKQVSDAEWSKTEKEVAQQAFKRAYEREINTLIKEVCEQASAIAELDHVWQLHNFLSARRHEIDGKYDYRYSVLIFVFARLVKEGWLHLDELKGLKTDKLTKIAALTRI
Uniprot	U5DP51	Uncharacterized protein	KR51_00020620	Rubidibacter lacunae KORDI 51-2	cellular organisms, Bacteria, Terrabacteria group, Cyanobacteria/Melainabacteria group, Cyanobacteria, Oscillatoriophycideae, Chroococcales, Aphanothecaceae, Rubidibacter, Rubidibacter lacunae, Rubidibacter lacunae KORDI 51-2	108	12436	MLDSCSRWTHAEEQVARTAFDQAYQRETKSLIEVVRERAGAIAELDDIWALHDFLSARRFDIDGKYDREQPGLLFSLAQLVKEGWLQLDDLQELDPNKRAKVSALANM
Uniprot	A0A0F5Y9U5	Uncharacterized protein	WN50_27895	Limnoraphis robusta CS-951	cellular organisms, Bacteria, Terrabacteria group, Cyanobacteria/Melainabacteria group, Cyanobacteria, Oscillatoriophycideae, Oscillatoriales, Oscillatoriaceae, Limnoraphis, Limnoraphis robusta, Limnoraphis robusta CS-951	109	12725	MIPVSDIQWSTAEKEIAREAFEKAYQREITALIKVVREQASEITQLDEIWLLHDFLSGRRHDIDGKYDHRDSLLIFTFAQLVKEGWLHLDELKGLDAEKISKVSVLTRM
Uniprot	A0A2W6ZCC4	Uncharacterized protein	DCF23_02390 DCF24_09005	Cyanobium sp.	cellular organisms, Bacteria, Terrabacteria group, Cyanobacteria/Melainabacteria group, Cyanobacteria, Synechococcales, Synechococcaceae, Cyanobium, unclassified Cyanobium, Cyanobium sp.	108	12112	MEAGQKGWSSEERHIAKQAVDLAYEREVASLITDLHSRVSSVHCSGDVWSLHDYLSAKRHEMDGKFDLRDSSLVFVFATLVKDGLLSVHELDGLDQEKLVKISALARM
Uniprot	A0A1J1JFJ3	Uncharacterized protein	PLAM_2314	Planktothrix agardhii (Oscillatoria agardhii)	cellular organisms, Bacteria, Terrabacteria group, Cyanobacteria/Melainabacteria group, Cyanobacteria, Oscillatoriophycideae, Oscillatoriales, Microcoleaceae, Planktothrix, Planktothrix agardhii (Oscillatoria agardhii)	108	12557	MQVNEIEWSEAEKEVAKAAFDMAYKREINALIDEVRKQSSEIVEIDDIWRLHDFLSARRHNIDGKYDYEYSGLIFVFASLVKDGWLHLNELDGLNTNKLTKIAAIARI
Uniprot	A0A2S6CUN5	Uncharacterized protein	CUN59_09720	Cuspidothrix issatschenkoi CHARLIE-1	cellular organisms, Bacteria, Terrabacteria group, Cyanobacteria/Melainabacteria group, Cyanobacteria, Nostocales, Aphanizomenonaceae, Cuspidothrix, Cuspidothrix issatschenkoi, Cuspidothrix issatschenkoi CHARLIE-1	113	13365	MVQVNEVEWSNTEKNVARKAFDQAYIREVNTLIKEVCQQASVISDLNHLWELHDFLSARRHELDGKYDYRYSVLIFVFARLLNEGWLHINELEGLAKDKLIKIEALARMQNFN
Uniprot	K9YBC0	Uncharacterized protein	PCC7418_1998	Halothece sp. (strain PCC 7418) (Synechococcus sp. (strain PCC 7418))	cellular organisms, Bacteria, Terrabacteria group, Cyanobacteria/Melainabacteria group, Cyanobacteria, Oscillatoriophycideae, Chroococcales, Aphanothecaceae, Halothece cluster, Halothece, unclassified Halothece, Halothece sp. (strain PCC 7418) (Synechococcus sp. (strain PCC 7418))	108	12348	MSTTENQWSSVEKEIAQVALEKARSREIETLIETVRSASASITSLDDMWRLHDFLSSKRHELDGKYDDRESVLIFVFSQLVKEGWLSLEELDGLSSDKISKLKALGRM
Uniprot	A0A2K2ZQ72	Uncharacterized protein	BEN50_18670	Euhalothece sp. KZN 001	cellular organisms, Bacteria, Terrabacteria group, Cyanobacteria/Melainabacteria group, Cyanobacteria, Oscillatoriophycideae, Chroococcales, Aphanothecaceae, Halothece cluster, Euhalothece, unclassified Euhalothece, Euhalothece sp. KZN 001	108	12494	MSTTENYWSSTEKEIAQRAFEKARSREINTLIETVRNAASSVSNLDEIWRLHDYLSSKRYEIDGKYDDRESVLIFVFSQLVKEGWLSVEDLEGLNSDKIAKLNALAKM
Uniprot	K9XQR4	Uncharacterized protein	Sta7437_0841	Stanieria cyanosphaera (strain ATCC 29371 / PCC 7437)	cellular organisms, Bacteria, Terrabacteria group, Cyanobacteria/Melainabacteria group, Cyanobacteria, Pleurocapsales, Dermocarpellaceae, Stanieria, Stanieria cyanosphaera, Stanieria cyanosphaera (strain ATCC 29371 / PCC 7437)	106	12482	MSEIKWSETEEKIAKQAFEKAYQRETLALIKIVREQASQITKLEDLWYLHDLLSTKRHEIDGKYDYDHSTLVFVFAQLLKQGWLHHEELKGLNPKTLSKISALARI
Uniprot	A0A433UT48	Uncharacterized protein	DSM106972_085730	Calothrix desertica PCC 7102	cellular organisms, Bacteria, Terrabacteria group, Cyanobacteria/Melainabacteria group, Cyanobacteria, Nostocales, Rivulariaceae, Calothrix, Calothrix desertica, Calothrix desertica PCC 7102	108	12513	MQATDTQWSQTEQEVAKAAFDKAYEREINALAKEVHKIADGITQLDDIWVLHDFLSARRHDIDGKYDYRYSVLVFVFARLLKEGWLNLEELEGLAPDKLKKVSALSRM
Uniprot	A0A4Q9J8L2	Uncharacterized protein	B4U84_00885	Westiellopsis prolifica IICB1	cellular organisms, Bacteria, Terrabacteria group, Cyanobacteria/Melainabacteria group, Cyanobacteria, Nostocales, Hapalosiphonaceae, Westiellopsis, Westiellopsis prolifica, Westiellopsis prolifica IICB1	109	12906	MKQVSDVEWSNTEKQVAQQAFERAYEREIDTLIKEVREKASAIADLDHIWQLHNFLSARRHEIDGKYDYRYSVLIFVFARLVKEGWLHLDELKGLNTDKLTKITALTRI
Uniprot	A0A3N6NTT1	Uncharacterized protein	D5R40_09120	Okeania hirsuta	cellular organisms, Bacteria, Terrabacteria group, Cyanobacteria/Melainabacteria group, Cyanobacteria, Oscillatoriophycideae, Oscillatoriales, Oscillatoriaceae, Okeania, Okeania hirsuta	110	12577	MMQLTNTQWSITEENIAQAALEKAKEREINALITTVRQQASGIQEFDDLWYLHDFLSARRYDLDGKYDSRNATVIFALAGLVKEGWLKLGELEGLDKEKITKVSAMTRII
Uniprot	A0A1Z4VEJ2	Uncharacterized protein	NIES932_15030	Raphidiopsis curvata NIES-932	cellular organisms, Bacteria, Terrabacteria group, Cyanobacteria/Melainabacteria group, Cyanobacteria, Nostocales, Aphanizomenonaceae, Raphidiopsis, Raphidiopsis curvata, Raphidiopsis curvata NIES-932	111	13055	MGIVQVNDIEWSTTEKELARKAFDQAYKREINALIETVREQASTITKLDEIWQLHDFLSARRHQIDGKYDYRYSVLIFVFAQLVREGWLHIEDLKGLEVDKIAKVSALTRM
Uniprot	E0UDW5	Uncharacterized protein	Cyan7822_4644	Gloeothece verrucosa (strain PCC 7822) (Cyanothece sp. (strain PCC 7822))	cellular organisms, Bacteria, Terrabacteria group, Cyanobacteria/Melainabacteria group, Cyanobacteria, Oscillatoriophycideae, Chroococcales, Aphanothecaceae, Gloeothece, Gloeothece verrucosa, Gloeothece verrucosa (strain PCC 7822) (Cyanothece sp. (strain PCC 7822))	108	12733	MQQTEIIWSETEQKIAQEAFSKAYQRETSFLINQIRSQATEIVDLDQVWQLHDFLSARRHQIDGKYDYQYSALIFVFAQLVKEGWLHLKDLEGLDQDKLAKIAALTRM
Uniprot	A0A1J1KBR6	Uncharacterized protein	PL9631600002	Planktothrix paucivesiculata PCC 9631	cellular organisms, Bacteria, Terrabacteria group, Cyanobacteria/Melainabacteria group, Cyanobacteria, Oscillatoriophycideae, Oscillatoriales, Microcoleaceae, Planktothrix, Planktothrix paucivesiculata, Planktothrix paucivesiculata PCC 9631	109	12633	MMQVNEIEWSEAEKEVAKAAFDMAYKREIKALIDEVRKQSSAIVEIDDIWRLHDFLSARRHNIDGKYDYEYSGLIFVFASLVKDGWLNLNELDGLNTNKLIKIAAIARI
Uniprot	A0A261KR47	Uncharacterized protein	AFK68_13525	Hydrocoleum sp. CS-953	cellular organisms, Bacteria, Terrabacteria group, Cyanobacteria/Melainabacteria group, Cyanobacteria, Oscillatoriophycideae, Oscillatoriales, Microcoleaceae, Hydrocoleum, unclassified Hydrocoleum, Hydrocoleum sp. CS-953	110	12652	MMQITNIEWSTTEEKIAQSALEKAKEREINALMATVRQQASGIQEFNDLWRLHDFLSARRYDLDGKYDSRNATVIFSLAGLVKEGWLNITELEGLDQEKITKVSAMTRMI
Uniprot	A3IGP3	Uncharacterized protein	CY0110_09682	Crocosphaera chwakensis CCY0110	cellular organisms, Bacteria, Terrabacteria group, Cyanobacteria/Melainabacteria group, Cyanobacteria, Oscillatoriophycideae, Chroococcales, Aphanothecaceae, Crocosphaera, Crocosphaera chwakensis, Crocosphaera chwakensis CCY0110	109	12477	MKTNTQEWSQTDQKIAYEALTKAYARETEALIAEINQKASQVNHIDEIWALNDYLSSKRYNIDGKYDFRESASVFVLAQLVKEKWLTLDELTDLTPSTKAKVAALTKMS
Uniprot	A0A1C0V2J9	Uncharacterized protein	BCD64_26250	Nostoc sp. MBR 210	cellular organisms, Bacteria, Terrabacteria group, Cyanobacteria/Melainabacteria group, Cyanobacteria, Nostocales, Nostocaceae, Nostoc, unclassified Nostoc, Nostoc sp. MBR 210	108	12959	MQVSEIEWSKTEEEIAKQAFEKAYKREIEAVIQEVQQRSSMMTEADEMWQLHDFLSARRHEIDGKYDYRYSVLIFVFARLIKEGWLHLDELQGLEKDKLTKVAVMTRM
Uniprot	A0A0S3TXA8	Uncharacterized protein	LEP3755_03320	Leptolyngbya sp. NIES-3755	cellular organisms, Bacteria, Terrabacteria group, Cyanobacteria/Melainabacteria group, Cyanobacteria, Synechococcales, Leptolyngbyaceae, Leptolyngbya, Leptolyngbya sp. NIES-3755	109	12876	MQVSEIQWSETEKKISRSAFDQAYQREIEALIQEVIHRSGTVSNQQDVWQLHDFLSARRHEIDGKYDYRYSGLIFVFARLIKEKWLSIEELKGLETDKLAKISALIRMS
Uniprot	A0A2H6LAN6	Fluorescence recovery protein	NCWK1_0019	Nostoc cycadae WK-1	cellular organisms, Bacteria, Terrabacteria group, Cyanobacteria/Melainabacteria group, Cyanobacteria, Nostocales, Nostocaceae, Nostoc, Nostoc cycadae, Nostoc cycadae WK-1	108	13001	MHVSEVEWSKTEEEIAKHAFEKAYQREIEAVIQEVRQRSSKMTQADEMWQLHDFLSARRHEIDGKYEYRYSVLIFVFARLIKEGWLHLDELQGLEKDKLTKVAVMTRM
Uniprot	H1W9V5	Fluorescence recovery protein (RFP)	rfpX ARTHRO_1420022	Limnospira indica PCC 8005	cellular organisms, Bacteria, Terrabacteria group, Cyanobacteria/Melainabacteria group, Cyanobacteria, Oscillatoriophycideae, Oscillatoriales, Microcoleaceae, Limnospira, Limnospira indica, Limnospira indica PCC 8005	106	12244	MSEINWSEQDKNAAVDALHKAYEREVKILIDEVKQKAFNLTEIDEVWKLHDFLSARRHDIDGKYDYRDAASVFVLATLVKQGWLSLEELQVLGQDKLAKISALTRL
Uniprot	A0A2W4WJR2	Uncharacterized protein	DCF17_03675	Leptolyngbya antarctica	cellular organisms, Bacteria, Terrabacteria group, Cyanobacteria/Melainabacteria group, Cyanobacteria, Synechococcales, Leptolyngbyaceae, Leptolyngbya, Leptolyngbya antarctica	110	1252	MMHTSELQWTAQEQSIAKAAFDRAYQREIQALVQLVRDQAGSIAGTDDVWRLHDFLSARRHELDGKYDERESALLFVFADLLKAGWLSLDDLNGLDALKLSKITALTRLM
Uniprot	A0A1S2A0M0	Uncharacterized protein	BCV64_01710	Cylindrospermopsis raciborskii MVCC14	cellular organisms, Bacteria, Terrabacteria group, Cyanobacteria/Melainabacteria group, Cyanobacteria, Nostocales, Aphanizomenonaceae, Cylindrospermopsis, Cylindrospermopsis raciborskii, Cylindrospermopsis raciborskii MVCC14	111	13057	MGIVQVNDIEWSTTEKELARKAFDRAYEREISALIETVREQASTITKLDEIWQLHDFLSARRHQIDGKYDYRYSVLIFVFAQLVREGWLHIKDLEGLEVDKIAKVSALTRM
Uniprot	A0A0V7ZE40	Uncharacterized protein	BC008_38490	Mastigocoleus testarum BC008	cellular organisms, Bacteria, Terrabacteria group, Cyanobacteria/Melainabacteria group, Cyanobacteria, Nostocales, Hapalosiphonaceae, Mastigocoleus, Mastigocoleus testarum, Mastigocoleus testarum BC008	108	12821	MQVNSISWSETEKEVAHQAFDKAYEREINALLEEVRTQASNITEIDQIWRLHDFLSARRHDIDGKYDYRYSVLIFVFARLLKEKWLDMSDLEGLERAKLTKIAALTRM
Uniprot	A0A1Z4UBY1	Uncharacterized protein	NIES50_53020	Aulosira laxa NIES-50	cellular organisms, Bacteria, Terrabacteria group, Cyanobacteria/Melainabacteria group, Cyanobacteria, Nostocales, Fortieaceae, Aulosira, Aulosira laxa, Aulosira laxa NIES-50	108	12628	MKVNEVSWSDLEQEVAQAAFQKAYEREINALIQDVRDNAVQISELEDIWRLHNFLSAKRHEIDGKYDYNYSVLVFVFATLIKQGWLHLDELKGLDQDKLTKIGSLSRM
Uniprot	A0A1Z4KIH9	Uncharacterized protein	NIES23_15610	Trichormus variabilis NIES-23	cellular organisms, Bacteria, Terrabacteria group, Cyanobacteria/Melainabacteria group, Cyanobacteria, Nostocales, Nostocaceae, Trichormus, Anabaena variabilis, Trichormus variabilis NIES-23	108	12553	MYVSEAEWSDIEKTIARTAFDQAYKREIEALLKQVQKEASTLVELDELWQLHDFLSARRHEIEGKYDYQYSALLFVFAGLVKDGWLHVNELEGLSKDKLSKVSALARM
Uniprot	L7EAR7	Uncharacterized protein	O53_683	Microcystis aeruginosa TAIHU98	cellular organisms, Bacteria, Terrabacteria group, Cyanobacteria/Melainabacteria group, Cyanobacteria, Oscillatoriophycideae, Chroococcales, Microcystaceae, Microcystis, Microcystis aeruginosa, Microcystis aeruginosa TAIHU98	108	12739	MPMSEIIWSDTEQEIAQTAFQKAYQRETSTLIEHIKEQSGQITVLDDIWQMHDYLSARRHQIDGKYEYRYTSLIFVFAQLLKEGWLKLEDLNGLEKDKLAKIAALSRM
Uniprot	A0A140K3K4	Uncharacterized protein	STA3757_13000	Stanieria sp. NIES-3757	cellular organisms, Bacteria, Terrabacteria group, Cyanobacteria/Melainabacteria group, Cyanobacteria, Pleurocapsales, Dermocarpellaceae, Stanieria, unclassified Stanieria, Stanieria sp. NIES-3757	106	12476	MSEIQWSETEEKIAKQAFEKAYQRETSALIKIVREQASEITELEDLWYLHDLLSTKRHEIDGKYDYDHSTLVFVFAQLLKQGWLHHEELKGLNPKTLSKISALARM
Uniprot	Q0I963	Uncharacterized protein	sync_1805	Synechococcus sp. (strain CC9311)	cellular organisms, Bacteria, Terrabacteria group, Cyanobacteria/Melainabacteria group, Cyanobacteria, Synechococcales, Synechococcaceae, Synechococcus, unclassified Synechococcus, Synechococcus sp. (strain CC9311)	110	12564	MNHVMTQVDWPSAETEIARKAFQKGNERAVTVLISVIQNMSQSLSTLESVCSLHDYLSTERFEIEGRMEFNHDTILFSLAEMMKRNLIEANDLQGLDPKKVSKIKAMSLF
Uniprot	A0A2T1C837	Uncharacterized protein	C7B64_04395	Merismopedia glauca CCAP 1448/3	cellular organisms, Bacteria, Terrabacteria group, Cyanobacteria/Melainabacteria group, Cyanobacteria, Synechococcales, Merismopediaceae, Merismopedia, Merismopedia glauca, Merismopedia glauca CCAP 1448/3	113	13269	MLGLRTPVTEIKWSETEEKIAQVAFDKAYQRETTALIEEIRQYTGAIATLDDTWRLHDFLSSRRHDIDGKYDYRYPVLLFVFARLVQEKWLDLSELDGLDREKLAKIASIAMM
Uniprot	A0A1Z4HIH2	Uncharacterized protein	NIES2107_13760	Nostoc carneum NIES-2107	cellular organisms, Bacteria, Terrabacteria group, Cyanobacteria/Melainabacteria group, Cyanobacteria, Nostocales, Nostocaceae, Nostoc, Nostoc carneum, Nostoc carneum NIES-2107	108	12628	MKVNEVSWSDLEQEVAQAAFQKAYEREINALIQDVRDNAVQISELEDIWRLHNFLSAKRHEIDGKYDYNYSVLVFVFATLIKQGWLHLDELKGLDQDKLTKIGSLSRM
Uniprot	A0A2G4G0V8	Uncharacterized protein	CK549_05025	Cyanobium sp. Baikal-G2	cellular organisms, Bacteria, Terrabacteria group, Cyanobacteria/Melainabacteria group, Cyanobacteria, Synechococcales, Synechococcaceae, Cyanobium, unclassified Cyanobium, Cyanobium sp. Baikal-G2	109	12555	MMDTMLEGWTDTEQAVAREAFDRAYTRAVQQLVAEVRTKADELDSAETVWQLHDYLSIERHTIEGRFDFRLDGILFVFASLVKDSLLQIDELNGLEAEKLAKILAMSRF
Uniprot	A0A1Z4N0W1	Uncharacterized protein	NIES37_33580	Tolypothrix tenuis PCC 7101	cellular organisms, Bacteria, Terrabacteria group, Cyanobacteria/Melainabacteria group, Cyanobacteria, Nostocales, Tolypothrichaceae, Tolypothrix, Tolypothrix tenuis, Tolypothrix tenuis PCC 7101	108	12628	MKVNEVSWSDLEQEVAQAAFQKAYEREINALIQDVRDNAVQISELEDIWRLHNFLSAKRHEIDGKYDYNYSVLVFVFATLIKQGWLHLDELKGLDQDKLTKIGSLSRM
Uniprot	A0A0P4UQR5	Uncharacterized protein	NIES2104_10300	Leptolyngbya sp. NIES-2104	cellular organisms, Bacteria, Terrabacteria group, Cyanobacteria/Melainabacteria group, Cyanobacteria, Synechococcales, Leptolyngbyaceae, Leptolyngbya, Leptolyngbya sp. NIES-2104	109	12801	MQVSEIQWSKTEKEISRSAFDRAYQREIDSLIQTVTETAKTISDIDQVWQLHDFLSAKRHEIDGKYDYQYSSLIFVFARLVREQWLSIDELEGLEAEKLAKISALVKML
Uniprot	A0A1U7JAL9	Uncharacterized protein	NIES30_01500	Phormidium tenue NIES-30	cellular organisms, Bacteria, Terrabacteria group, Cyanobacteria/Melainabacteria group, Cyanobacteria, Oscillatoriophycideae, Oscillatoriales, Oscillatoriaceae, Phormidium, Phormidium tenue, Phormidium tenue NIES-30	109	12391	MHTSELQWSTEEKAIAKEAIATAYSREISGLVQVVRDRASSLNSMDDLWQLHDFLSARRHELDGKYDDRESALLFVFSSLVKEGWLSLDELEGLDAAKLSKITALTRMF
Uniprot	A0A1Z4M8H2	Uncharacterized protein	NIES3275_17870	Fremyella diplosiphon NIES-3275	cellular organisms, Bacteria, Terrabacteria group, Cyanobacteria/Melainabacteria group, Cyanobacteria, Nostocales, Rivulariaceae, Microchaete, Microchaete diplosiphon (Fremyella diplosiphon), Fremyella diplosiphon NIES-3275	108	12628	MKVNEVSWSDLEQEVAQAAFQKAYEREINALIQDVRDNAVQISELEDIWRLHNFLSAKRHEIDGKYDYNYSVLVFVFATLIKQGWLHLDELKGLDQDKLTKIGSLSRM
Uniprot	A0A1Z4K8T5	Uncharacterized protein	NIES22_54540	Calothrix brevissima NIES-22	cellular organisms, Bacteria, Terrabacteria group, Cyanobacteria/Melainabacteria group, Cyanobacteria, Nostocales, Rivulariaceae, Calothrix, Calothrix brevissima, Calothrix brevissima NIES-22	108	12637	MKVNEVSWSDLEQEVAQAAFQKAYEREINALIQDVRDNAVHISELEDIWRLHNFLSAKRHEIDGKYDYNYSVLVFVFATLIKQGWLHLDELKGLDQDKLTKIGSLSRM
Uniprot	B4VWS0	Uncharacterized protein	MC7420_3635	Coleofasciculus chthonoplastes PCC 7420	cellular organisms, Bacteria, Terrabacteria group, Cyanobacteria/Melainabacteria group, Cyanobacteria, Oscillatoriophycideae, Oscillatoriales, Coleofasciculaceae, Coleofasciculus, Coleofasciculus chthonoplastes, Coleofasciculus chthonoplastes PCC 7420	108	1267	MQVNEIIWSEAEQQIAKDAFEKAYQRETNALITQVREYASGITELDEVWRLHDFLSARRHDIDGKYDYDYSALLFLFARLVKEEWLKLEDLSGLDQSKLAKINALAQM
Uniprot	A0A3M9Z6G6	Uncharacterized protein	EDM05_17080	Leptolyngbya sp. IPPAS B-1204	cellular organisms, Bacteria, Terrabacteria group, Cyanobacteria/Melainabacteria group, Cyanobacteria, Synechococcales, Leptolyngbyaceae, Leptolyngbya, Leptolyngbya sp. IPPAS B-1204	108	12617	MQATDTTWSQTEKQIARTAFNNAYQRELDYLVKTVREQSSSLTEIDDVWRLHDFLSARRHEIDGKYDYRYSVLVFVLASLVREGWLQLSELEGLAADKLTKITALTRM
Uniprot	A0A2Z5X0V7	Uncharacterized protein	ABRG53_3044	Pseudanabaena sp. ABRG5-3	cellular organisms, Bacteria, Terrabacteria group, Cyanobacteria/Melainabacteria group, Cyanobacteria, Synechococcales, Pseudanabaenaceae, Pseudanabaena, unclassified Pseudanabaena, Pseudanabaena sp. ABRG5-3	108	12352	MQLTSAEWTETEENIAKKAFDIAYKREIDDLIDSVKHKAVSLSAIDDMWHLHDFLSAKRHEVDGKYDYRLPMLVFVFAGLVKDGWLSLSELEGLNPDKIAKISALARM
Uniprot	A0A4P7ZS06	Uncharacterized protein	CB0101_02075	Synechococcus sp. CB0101	cellular organisms, Bacteria, Terrabacteria group, Cyanobacteria/Melainabacteria group, Cyanobacteria, Synechococcales, Synechococcaceae, Synechococcus, unclassified Synechococcus, Synechococcus sp. CB0101	109	12537	MVEMTLEGWTDCEQEIARTAFNTAYQRSIDRLVLDVRSQCDNLNDADSVWKLHDFLSIQRHIIEGRFDFRLDGILFVFASLVKDQLLEVEELDGLDAGKLAKIKAMALF
Uniprot	A0A0X8WUZ5	Uncharacterized protein	O77CONTIG1_02126	Leptolyngbya sp. O-77	cellular organisms, Bacteria, Terrabacteria group, Cyanobacteria/Melainabacteria group, Cyanobacteria, Synechococcales, Leptolyngbyaceae, Leptolyngbya, Leptolyngbya sp. O-77	112	13038	MQATDIQWSKAEKEIARAAFERAYEREIQALVKEVRERAHGVGEVDDLWTLHDFLSARRHALEGKYDYRYSVLIFVFAQLVQEGWLELHELEGLATDKLTKVSALTRMGCHF
Uniprot	B1WY11	Uncharacterized protein	cce_1648	Crocosphaera subtropica (strain ATCC 51142 / BH68) (Cyanothece sp. (strain ATCC 51142))	cellular organisms, Bacteria, Terrabacteria group, Cyanobacteria/Melainabacteria group, Cyanobacteria, Oscillatoriophycideae, Chroococcales, Aphanothecaceae, Crocosphaera, Crocosphaera subtropica, Crocosphaera subtropica (strain ATCC 51142 / BH68) (Cyanothece sp. (strain ATCC 51142))	109	1231	MKTNTQQWSQTDQKIAQEALGKAYARETEALVAEINQKASQITHINDIWALNDYLNSKRYHIDGKYYSSDATSMFVLAQLVKEKWLTLDELTGLTPSTRAKVAALAKMS
Uniprot	A0A2T1EUP8	Uncharacterized protein	C7B81_14120	Aphanothece cf. minutissima CCALA 015	cellular organisms, Bacteria, Terrabacteria group, Cyanobacteria/Melainabacteria group, Cyanobacteria, Oscillatoriophycideae, Chroococcales, Aphanothecaceae, Aphanothece, Aphanothece minutissima, Aphanothece cf. minutissima CCALA 015	108	1251	MVSAVLEWTDQEQQVARRAFDKAHSRAAIGIIRAVQDHADRMDTVEDCWKLHDFLSIQRHEIEGRFDFRLPGLLFVFASLVKDGLLQVEELEGLERDKLNKITAMSRM
Uniprot	K9YRJ5	Uncharacterized protein	Dacsa_0304	Dactylococcopsis salina PCC 8305	cellular organisms, Bacteria, Terrabacteria group, Cyanobacteria/Melainabacteria group, Cyanobacteria, Synechococcales, Synechococcaceae, Dactylococcopsis, Dactylococcopsis salina (Myxobaktron salinum), Dactylococcopsis salina PCC 8305	108	12494	MSTTENYWSSTEKEIAQRAFEKARSREINTLIETVRNAASSVSNLDEIWRLHDYLSSKRYEIDGKYDDRESVLIFVFSQLVKEGWLSVEDLEGLNSDKIAKLNALAKM
Uniprot	A0A2T1DUP8	Uncharacterized protein	C7B82_28025	Leptolyngbya frigida ULC18	cellular organisms, Bacteria, Terrabacteria group, Cyanobacteria/Melainabacteria group, Cyanobacteria, Synechococcales, Leptolyngbyaceae, Leptolyngbya, Leptolyngbya frigida, Leptolyngbya frigida ULC18	108	12344	MQVSEAEWTDTEKTIARTAFDQAYGREIEALLKQVRADASTLVELSDLWRLHDFLSAKRHQVEGKYDYQYAALPFVFAGLVKDGWLHLQELEGLSKDKLAKINSLANM
Uniprot	A0A0D6AFD4	Uncharacterized protein	GM3708_1861	Geminocystis sp. NIES-3708	cellular organisms, Bacteria, Terrabacteria group, Cyanobacteria/Melainabacteria group, Cyanobacteria, Oscillatoriophycideae, Chroococcales, Chroococcaceae, Geminocystis, unclassified Geminocystis, Geminocystis sp. NIES-3708	110	12651	MTTIITESGWTTKEIEISQQILNKAYQRETETLVAQVQHQINNMTDIAQLWQVHDLLSAKRYDLDGKYDARESMLIFTFAQLLKEGWISLEELHGLDQAKLAKVSSLSKI
Uniprot	A0A251W9V1	Uncharacterized protein	B0A82_22745	Alkalinema sp. CACIAM 70d	cellular organisms, Bacteria, Terrabacteria group, Cyanobacteria/Melainabacteria group, Cyanobacteria, Synechococcales, Leptolyngbyaceae, Alkalinema, unclassified Alkalinema, Alkalinema sp. CACIAM 70d	108	12096	MQATGISWAPTEKTIAKAALDCAYERETAALLQEVQDRAKNVLCLDDLWQLHDFLSARRHDIEGKYEEDCSSLLFGLARLVKEGWLTGEELTGLSPDKRSKVSALARM
Uniprot	D4TP59	Uncharacterized protein	CRD_01082	Raphidiopsis brookii D9	cellular organisms, Bacteria, Terrabacteria group, Cyanobacteria/Melainabacteria group, Cyanobacteria, Nostocales, Aphanizomenonaceae, Raphidiopsis, Raphidiopsis brookii, Raphidiopsis brookii D9	111	13045	MGMVQVNDIEWSTTEKELARKAFDRAYEREISALIETVREQAGTLTKLDEIWQLHDFLSARRHQIDGKYDYRYSVLIFVFAQLVREGWLHIKDLEGLEVDKIAKVSALTRM

## Sheet: Supplementary file 3
Phylogenetic tree is presented in Newick format with branch lengths and bootstrap values (1000 replicates)
The evolutionary history was inferred by using the Maximum Likelihood method based on the JTT matrix-based model. The tree with the highest log likelihood (-12209,85) is shown. The percentage of trees in which the associated taxa clustered together is shown next to the branches. Initial tree(s) for the heuristic search were obtained automatically by applying Neighbor-Join and BioNJ algorithms to …
((((((((((((A0A1Z4UBY1:0,00000000,A0A1Z4HIH2:0,00000000)0,1350:0,00000000,A0A1Z4N0W1:0,00000000)0,0520:0,00000000,(A0A0D6KMZ1:0,00000000,(A0A1Z4M8H2:0,00000000,A0A1Z4K8T5:0,00000000)0,1360:0,00000000)0,0520:0,00000000)0,9950:0,09652978,A0A0T7BSY5:0,09676927)0,6950:0,04750952,A0A1Q8ZGW6:0,19185367)0,7600:0,11925440,(A0A2S6CUN5:0,29293704,(A0A0M0SM91:0,04544085,(A0A328IFN0:0,01151439,(A0A4D9CDV6:0,…
Multiple sequence alignment used to construct the tree
CLUSTAL W (1.83) multiple sequence alignment
P74103 ----ML-QTA--------------EAPWSQAETQSAHALFRKAYQRELDGLLATVQAQASQITQIDDLWKLHDFLSAKRH
A0A3M9Z6G6 -----M-QAT--------------DTTWSQTEKQIARTAFNNAYQRELDYLVKTVREQSSSLTEIDDVWRLHDFLSARRH
K9YBC0 -----M-STT--------------ENQWSSVEKEIAQVALEKARSREIETLIETVRSASASITSLDDMWRLHDFLSSKRH
A0A433UT48 -----M-QAT--------------DTQWSQTEQEVAKAAFDKAYEREINALAKEVHKIADGITQLDDIWVLHDFLSARRH
U7QJA4 ----MI-PVS--------------DIEWSTAEKEIARQAFKKAYQREITALIQVVREQAGEITKLDDIWLLHDFLSARRH
A0A0F5Y9U5 ----MI-PVS--------------DIQWSTAEKEIAREAFEKAYQREITALIKVVREQASEITQLDEIWLLHDFLSGRRH
A0A1Z4VEJ2 --MGIV-QVN--------------DIEWSTTEKELARKAFDQAYKREINALIETVREQASTITKLDEIWQLHDFLSARRH
A0A1D9GCB7 --------MS--------------ESNWSESEKKGAQEAFKKAYEREIETLIDEVKQKGSEISEIDGVWQLHDLLSARRH
A0A2T1LUR3 ----MM-QVS--------------EITWTETEKEIAQQAFKKAYDREIMALIDYVQDQSDKIAKIEDVWYLHDFLSARRH
A0A1S2A0M0 --MGIV-QVN--------------DIEWSTTEKELARKAFDRAYEREISALIETVREQASTITKLDEIWQLHDFLSARRH
A0A0V7ZE40 -----M-QVN--------------SISWSETEKEVAHQAFDKAYEREINALLEEVRTQASNITEIDQIWRLHDFLSARRH
A0A0M0SM91 ----MK-QVS--------------DAEWSKTEKEVAQQAFKRAYEREINTLIKEVCEQASAIAELDHVWQLHNFLSARRH
D4TP59 --MGMV-QVN--------------DIEWSTTEKELARKAFDRAYEREISALIETVREQAGTLTKLDEIWQLHDFLSARRH
A0A1C0V2J9 -----M-QVS--------------EIEWSKTEEEIAKQAFEKAYKREIEAVIQEVQQRSSMMTEADEMWQLHDFLSARRH
A0A1Z4T0E3 -----M-QAT--------------DIQWSKTEQEVAKAAFDKAYEREISALIEQVHQQAATITQLDEIWVLHDYLSARRH
A0A4D9CDV6 ----MK-QVS--------------DVEWSNTEKQVAQQAFERAYEREIDTLIKEVREKASAIADLDHIWQLHNFLSARRH
A0A4Q9J8L2 ----MK-QVS--------------DVEWSNTEKQVAQQAFERAYEREIDTLIKEVREKASAIADLDHIWQLHNFLSARRH
A0A1Z4JH45 --------MS--------------EIHWTQTEQEISRSAFDRAYQREIQALMQDVAERANQVSEVSDLWQFHDFLSARRH
K9YRJ5 -----M-STT--------------ENYWSSTEKEIAQRAFEKARSREINTLIETVRNAASSVSNLDEIWRLHDYLSSKRY
A0A2K2ZQ72 -----M-STT--------------ENYWSSTEKEIAQRAFEKARSREINTLIETVRNAASSVSNLDEIWRLHDYLSSKRY
A0A0X8WUZ5 -----M-QAT--------------DIQWSKAEKEIARAAFERAYEREIQALVKEVRERAHGVGEVDDLWTLHDFLSARRH
A0A3S1A3G2 -----M-QAS--------------ETEWTDIEKKIARTAFEQAYKREIDALLKQVQKEASTLVDLNDIWRLHDFLSAKRH
A0A328IFN0 ----MK-QVS--------------DTEWSKTEKEVAQQAFERAYEREIDTLIKEVREKASAIADLDHIWHLHNFLSARRH
A0A1J1LVU6 ----MM-QVN--------------EIEWSEAEKEVAKAAFDTAYQREIKALIDEVRKQSSAIVEIDDIWRLHDFLSARRH
A0A2W4WJR2 ----MM-HTS--------------ELQWTAQEQSIAKAAFDRAYQREIQALVQLVRDQAGSIAGTDDVWRLHDFLSARRH
A0A2H6LAN6 -----M-HVS--------------EVEWSKTEEEIAKHAFEKAYQREIEAVIQEVRQRSSKMTQADEMWQLHDFLSARRH
A0A073CCR0 ----MM-QVN--------------EIEWSEAEKEVAKAAFDMAYKREINALIDEVRKQSSEIVEIDDIWRLHDFLSARRH
A0A1J1L8A9 ----MM-QVN--------------EIEWSEAEKEVAKAAFDMAYKREINALIDEVRKQSSEIVEIDDIWRLHDFLSARRH
A0A3F3KQN7 --MGMV-QVN--------------DIEWSTTEKELARKAFDLAYEREINALIETVREQAGTITKLDEIWQLHDFLSARRH
A0A1Z4GMR8 -----M-QVS--------------EIEWSKTEEEIAKQAFDKAYQREIEAVIQEVRQRSSMMTRADEMWQLHDFLSARRH
L8LTI6 ----MM-QLT--------------ETSWTETEKTVAEQAFTTAYARETNALIKTVCEQSTEIQQLEDIWRLHDFLSARRH
A0A140K3K4 --------MS--------------EIQWSETEEKIAKQAFEKAYQRETSALIKIVREQASEITELEDLWYLHDLLSTKRH
L7EAR7 -----M-PMS--------------EIIWSDTEQEIAQTAFQKAYQRETSTLIEHIKEQSGQITVLDDIWQMHDYLSARRH
A0A1Z4KIH9 -----M-YVS--------------EAEWSDIEKTIARTAFDQAYKREIEALLKQVQKEASTLVELDELWQLHDFLSARRH
A0A1U7JAL9 -----M-HTS--------------ELQWSTEEKAIAKEAIATAYSREISGLVQVVRDRASSLNSMDDLWQLHDFLSARRH
A0A1T4ZE83 ----MM-QVN--------------EIEWSEAEKEVAKAAFDMAYKREIKALIDEVRKQSSAIVEIDDIWRLHDFLSARRH
K9XQR4 --------MS--------------EIKWSETEEKIAKQAFEKAYQRETLALIKIVREQASQITKLEDLWYLHDLLSTKRH
A0A1Z4UBY1 -----M-KVN--------------EVSWSDLEQEVAQAAFQKAYEREINALIQDVRDNAVQISELEDIWRLHNFLSAKRH
A0A1Z4HIH2 -----M-KVN--------------EVSWSDLEQEVAQAAFQKAYEREINALIQDVRDNAVQISELEDIWRLHNFLSAKRH
A0A1Z4N0W1 -----M-KVN--------------EVSWSDLEQEVAQAAFQKAYEREINALIQDVRDNAVQISELEDIWRLHNFLSAKRH
A0A0D6KMZ1 -----M-KVN--------------EVSWSDLEQEVAQAAFQKAYEREINALIQDVRDNAVQISELEDIWRLHNFLSAKRH
A0A1Z4M8H2 -----M-KVN--------------EVSWSDLEQEVAQAAFQKAYEREINALIQDVRDNAVQISELEDIWRLHNFLSAKRH
Q3M6D9 -----M-HVS--------------EAEWTDIEKKIARTAFDQAYKREIEALLKQVQKEASTLVELDGLWQLHDFLSARRH
A0A1J1JFJ3 -----M-QVN--------------EIEWSEAEKEVAKAAFDMAYKREINALIDEVRKQSSEIVEIDDIWRLHDFLSARRH
A0A2A2TND2 -----M-QVI--------------DTEWSKIEQEVAKEAFDRAYKREIKSLMALVQEKAGAIAQLDDMWSLHDFLSAKRH
A0A0P4UQR5 -----M-QVS--------------EIQWSKTEKEISRSAFDRAYQREIDSLIQTVTETAKTISDIDQVWQLHDFLSAKRH
A0A2S6CUN5 ----MV-QVN--------------EVEWSNTEKNVARKAFDQAYIREVNTLIKEVCQQASVISDLNHLWELHDFLSARRH
E0UDW5 -----M-QQT--------------EIIWSETEQKIAQEAFSKAYQRETSFLINQIRSQATEIVDLDQVWQLHDFLSARRH
A0A1J1KBR6 ----MM-QVN--------------EIEWSEAEKEVAKAAFDMAYKREIKALIDEVRKQSSAIVEIDDIWRLHDFLSARRH
A0A1Z4K8T5 -----M-KVN--------------EVSWSDLEQEVAQAAFQKAYEREINALIQDVRDNAVHISELEDIWRLHNFLSAKRH
B7K963 -----M-LHT--------------EISWSDTEKKIADKAFKKAYDLETATLISQIRSKASEIVEVDDLWHLHDLLSARRH
A0A2W4UCK8 -----M-QQA--------------EVQWSPEEKKIAQAALEGARDREIEAVIKSIRENAGLISQIEDVWQLHDYLSAKRH
A0A0T7BSY5 -----M-KVN--------------EISWSDVEQEVAQTAFQIAYEREINALIQEVRGNAAQVSQLEDIWCLHNFLSARRH
B4VWS0 -----M-QVN--------------EIIWSEAEQQIAKDAFEKAYQRETNALITQVREYASGITELDEVWRLHDFLSARRH
K9RT87 ----ML-QIK--------------DTGWSEKEKAVAQASLKLAREREIASLMLEVSHQANGVTTLDDLWKLHDFLSARRY
A0A2Z5X0V7 -----M-QLT--------------SAEWTETEENIAKKAFDIAYKREIDDLIDSVKHKAVSLSAIDDMWHLHDFLSAKRH
A0A2T1DUP8 -----M-QVS--------------EAEWTDTEKTIARTAFDQAYGREIEALLKQVRADASTLVELSDLWRLHDFLSAKRH
A0A0S3TXA8 -----M-QVS--------------EIQWSETEKKISRSAFDQAYQREIEALIQEVIHRSGTVSNQQDVWQLHDFLSARRH
A0A1Q8ZGW6 ----MM-QVN--------------DVHWSDAEQNIAQQAFHNAYERETQALIQEIQEHASRVSTLEDIWQLHNFLSARRH
A0A2W4WBC1 -----M-QAI--------------NAEWTSTEEDIARRAFDIAHKREITSLIDLVRAKVNSLTEIEDIWRLHDFLSVKRH
B5W3T4 --------MS--------------EINWSEQDKNAAVDALHKAYEREVKILIDEVKQKAFNLTEIDEVWKLHDFLSARRH
H1W9V5 --------MS--------------EINWSEQDKNAAVDALHKAYEREVKILIDEVKQKAFNLTEIDEVWKLHDFLSARRH
A0A1Q4R1J2 -----M-PTT--------------KATWSHTEEAIAREAFRVAYAREVESMMAEAKRQAAAASSPDELWELNDFLSARRH
A0A261KR47 ----MM-QIT--------------NIEWSTTEEKIAQSALEKAKEREINALMATVRQQASGIQEFNDLWRLHDFLSARRY
A0A3N6NTT1 ----MM-QLT--------------NTQWSITEENIAQAALEKAKEREINALITTVRQQASGIQEFDDLWYLHDFLSARRY
L8N3N1 -----M-QVM--------------NAGWTQVEEEVARKAFDIAYKREINALIDSVRSKASCLNEIEDMWHLHDFLSVKRH
A0A0D6AFD4 ----MTTIIT--------------ESGWTTKEIEISQQILNKAYQRETETLVAQVQHQINNMTDIAQLWQVHDLLSAKRY
A0A251W9V1 -----M-QAT--------------GISWAPTEKTIAKAALDCAYERETAALLQEVQDRAKNVLCLDDLWQLHDFLSARRH
K9P3P2 -----M-VSA--------------VLEWTDQEQQVARRAFDKAHSRAAIGIIRAVQAHASRMDSVEECWKLHDFLSIQRH
U5DP51 ----M--LDS--------------CSRWTHAEEQVARTAFDQAYQRETKSLIEVVRERAGAIAELDDIWALHDFLSARRF
K9YKB0 ----MS-TTI--------------TTGWTETEIEISERVLKKAYERETKTLVEKVKNKIENLQQVEELWQVHDLLSSKRY
A0A1Z4RRJ7 ----ML-QSS--------------ETKWSPMEETIAQQALQKAYERETTALIEHIRDRANSINQLEDLWYLHDLLSTKRH
A0A081GJB9 -----M-GTV--------------VAGWTELEQQIARRAFDQAHARAVAGIIRAVQAHASRIECAEECWKLHDFLSIQRH
K9EYX4 ----MT-QDS--------------DISWSSRDKKIAEEALKKAYEREVAALISYVQEKAKLLTVLEDVWQLHTFLSASRH
A0A2T1EUP8 -----M-VSA--------------VLEWTDQEQQVARRAFDKAHSRAAIGIIRAVQDHADRMDTVEDCWKLHDFLSIQRH
A3IGP3 ----M--KTN--------------TQEWSQTDQKIAYEALTKAYARETEALIAEINQKASQVNHIDEIWALNDYLSSKRY
A0A2T1C837 MLGLRT-PVT--------------EIKWSETEEKIAQVAFDKAYQRETTALIEEIRQYTGAIATLDDTWRLHDFLSSRRH
A0A563VQT7 ----ML-QLN--------------ENKSSKTEEKIAKEALKIAYERETSTLIASIRDRASLLTELEELWYVHDLLSTKRH
A0A4P7ZS06 ----MV-EMT--------------LEGWTDCEQEIARTAFNTAYQRSIDRLVLDVRSQCDNLNDADSVWKLHDFLSIQRH
A0A2W6ZCC4 -----M-EAG--------------QKGWSSEERHIAKQAVDLAYEREVASLITDLHSRVSSVHCSGDVWSLHDYLSAKRH
B1WY11 ----M--KTN--------------TQQWSQTDQKIAQEALGKAYARETEALVAEINQKASQITHINDIWALNDYLNSKRY
A0A2P7MYD7 ----MM-DTM--------------LEGWTDTEQAVAREAFDRAYTRAVQQLVAQVRAKADELEDAETVWQLHDYLSIERH
K9PYV2 -----M-STT--------------KSEWSTTEELIAKTAFDMAYRREAAAMMAEAKRQAELAADPNDFWILNDFLSARRH
A0A2G4G0V8 ----MM-DTM--------------LEGWTDTEQAVAREAFDRAYTRAVQQLVAEVRTKADELDSAETVWQLHDYLSIERH
A0A2P7EGI6 ----MV-DTV--------------LEGWTTSEQTIAKSAFDQAYARSIDQLIKSVRSKSEQLDTAETIWALHDYLSIQRH
A0A2T1CVE7 ----ML-ETS--------------KNKFSVMEETIAKQALHKAYERETSALIAHVRDRSNAIAELEDLWYLHDLLSTKRY
T2IGE2 ----M--NSN--------------TQQSLDKDQKIAQEALKKAYARETKTLVAEINQKASQITDINDIWALSDYLNSQRY
Q0I963 ---MNH-VMT--------------QVDWPSAETEIARKAFQKGNERAVTVLISVIQNMSQSLSTLESVCSLHDYLSTERF
A0A1F4M1Z8 --------MP--------------GTTWKDSEKKIARRVFEAALQSELADIMATFKALAANAKEPEDMWKIQAFLAHAQR
A0A2D3WC42 --------------------MPIKSLAWSNSDKKSARVLFELAKKRDYTKLIHNIKNFS--LEKEENVWDLKTYLNDQAK
A0A1G3I7L1 --------MP--------------STTWKDSEKKIARRVFEAALQSELAEIMAKLKASAANAKWPDDMWEIQAYLAHAQR
A0A369VPE7 --------MH--------------DLKWSNGEKKVAKALFETALQRELQSYIQEFKDRAAKIESPDDLWSIAKQASQKQR
A0A554TWD7 --------MP--------------DDKWSPSEKKIARRAYEAALAVALARILAEFKAKAAQVATPSEMWDLEWYLRERRR
A0A2H9VE27 -----M-SFH--------------DLQWSPSEKKVARRAFDTALELALAKAMAEFKRKANAATTPSEMWEIEDYLRQQRR
A0A3M8EQ96 -----M-VQ-------------------EREE--VARRAFDGAYRRECAAILNMARTMASSAREPKDLWRIHEFLSEQRI
A0A4Y7BAW9 ---------M--------------SDGWSHGEKKLARRVFEEALGAELSEVMAEFRARAASIAEPDDMWQLEDYLREKRI
A0A431JWH4 --------MH--------------ELKWTQAEKKAARGLFDVALEREMTDYIARFKASAAAIETPDALWALLREAEQKRR
A0A2A3APY3 --------MN--------------ELSWSPSEKKVARAAYDKALERALASIMTEFKRRANAATTPSEMWEVEDYLKEQRR
A0A4R6ZZ89 ---------M--------------DFKWSDSEKKVARRAFDKALEKECASIMAKFKDMAAKVEKPEDLWAVHDYLTKQRR
A0A3R7X377 --------MP--------------ATDWTSAEETVARQAFELGKQRSVETLISTLQEQSQKLDTPESVWTLHDFLSTERY
A0A3D6BAJ2 -----M-NIY--------------EMKWTNEEKKVARKAFDNAYQREMDDIKSLLMNKVSQIKTNADIWAIEDFLFEKRK
A0A3A4WJV3 --------MN--------------DFIWSKAEKKIAKEAFDKAYQRESEKIIKEIKNY--KLEKPEDIWSLSEMLNKREK
A0A0A0D309 --------MP--------------DRKWSPSEKKIARRAYDAALGVALARILAEFKAKAAQAATPSEMWDLEDYLRRQRR
M5EZQ5 -----M-NYG--------------EPRWSPSEKKVARGAFDAALETVLDKTMAELKRKASAATIHSDMWDIEDYLRQQRR
N6ZU45 --------MH--------------ELKWTQAEKKAARSLFDVALEREMTDYIARFKASAATIETPDALWALLREAEQKRL
A0A2G2MUL2 ---------M--------------EEKWTKSQKVHARELFDLALGREYAELIDKINT--TKIETPDDVWDLHDMLGKKRK
A0A257CEQ6 --------MS---------------NEWSASEKKIARRVFDAALNQELADVLQVFKAMAANAADAEAMWATEEFLSTARR
A0A011QSW1 --------MQ--------------HSTWTEAEKKIARRVFNAALQRELVQVMAEFKRRAAGASDPDDMWSVQEYLAETRR
A0A349A6I1 ---MTM-NLH--------------EMKWSKTEKEAARRAFERAYLKECAAITAKIREMAATASEPEDLWRIQDLPARERR
A0A1F4KH11 --------MH--------------DLKWSESEKKLSRRVFEAALQAELADITAKFKAKAAAVTTPDEMWAVREFLAKHQR
A0A286D3A8 --------MY--------------DFKWSDSEKKLSRRVFDAALQAELAEIVADFKAKASAITTAREMWPLEQFLAQSAR
A0A0R3BRH3 -------MYR--------------DLQWSPAEKKIARKAYDSAVECALAKVMVEFKSRAVAAATPSEMWEVGEYLHQRRR
A0A090D9H1 -----M-SSN--------------ESRWSPSEKKIARRAFDAALEMALGKTMAELKSKTGAMTAPSDLWEIEDYLRQQRR
A0A2A6NNW4 -------MFH--------------HLKWSPAEKKIAREAYDAALQCALAKLMAEFKSKAGAVATPSEMWEVGDYLHQQRR
A0A451A0M9 -----M-IGT--------------QFKWSRTEKVLARRVFDKAYKREMEDLTNGVRAMLADNADGRAIWRIQECLSEQRY
A0A1E7GB31 --------MI--------------ETEWSKQEKEITHRAFSAAYERECISIAHKALKMMAEINEPSDIGEIHDYLTDKRK
A0A109K0E2 -------MWG--------------DLKWSASEKKAARRAYDAALDVALASVLAEFKRLAAAAAAPEDLWKIEDYLRRQRR
ISF6_RS26460 --------MS--------------ATEWTNRDKKIARAAFDAALKRELDALIIEFKARAARTEDVESLWKVSDWLERKRK
BM315_RS14195 --------MH--------------DLKWSAAEKKLAHHVFEAALTTELAEIMADFKARAAAITQPQEIWPLQEYLARKQR
C515_RS0106090 --------MP--------------DMNWSNTEKKLARHLFELALQRKFAALMTEFRTRAAQASEPEDLWNIERFLRDARR
G518_RS0115970 --------MS--------------NFNWSASEKKIARRVYDEALHAELAEVMAEFKEKAAAAASPDDMWAVEEYLERKRR
Q363_RS23335 --------MANSPDSAAQNVIPMYELKWSHAEKTVARRAFDLALGKELEALLQEAKGRAARIEEPSELWDLESWLTERRR
METSZ_RS0107510 ---------M--------------RFKWSDSEKKVARRAFDKALEKEYAAIIAKFKDMAAKAEKPEDLWAVHNYLTKQQR
ALA01S_RS28355 ---------------------------MDQCREKIARRVFDVALQRELAEVMETFKIRAASAKEPGDLWNIEEFLTQSRH
CP49_RS18030 -------MLR--------------DLKWSPSEKKIARRAFDTALKSALAEVMAEFKQKADAASTPSDMWEVEDYLRQQRR
MCON_RS15960 ----------------------------------MCARAYRAAYERECTVIAERVPRMASGIREPAGLWRIHNFLTEKRN
B9O00_RS05055 --------MR--------------DLKWSGSEKKVARRAFDQAAEAVFAELLAEFRRRAAAVAEPADLWELERHLRQQRR
EJ076_27380 -----M-MDS--------------RESWSASEKKIARNAFDAALEVALARTMAEFKSKANAARLPADMWEIEDYLNEQRR
A4R29_20035 --------MN--------------DFSWSASEKKLARHAFDKALEAALAKTMAEFKSKASAVTAPSQMWELEAYLREQRR
A9K65_014685 --------MN--------------DFSWSASEKKLARHAFDKALEAALAKTMAEFKSKASAVTVPSQMWELEAYLREQRR
Mesci_2682 --------MN--------------DSSWSASEKKLARHAFDKALEAALAKTMAEFKSKASAVTVPSQMWELEAYLREQRR
MLTONO_2065 --------MN--------------GFSWSASEKKLARHAFDMALEAALAKTMAEFKRKASAVTQPSEMWELEDYLREERR
sS8_5658 ---------M--------------NFKWSDSEKKVARRAFDKALEKECASIMARFKDMAAKVEKPEDLWAVHDYLTKQQR
EJ076_27380_1 -----M-MDS--------------RESWSASEKKIARNAFDAALEVALARTMAEFKSKANAARLPADMWEIEDYLNEQRR
UNDYM_5545 ----------------------MHDFKWSDTEKKVARAAYDNALQKELAAIMVRFKELANAVNSPHELWEIEAYLQKARK
FTW19_09195 --------MPS---TQDIESIHMRDWRWSQAEKIAARRAFEQALHQDLDTVMRTAKERIAQITKPAELWDIEDWLGDQRR
BSY238_2201 --------MD--------------PVTWSNSERKIARQAFYTALSREEASLLADFKARAAAAATQDDMWAVYRFLAERDG
.
P74103 EIDGKYDDRQSVIIFVFAQLLKEGLVQAEELTFLAADKQSKIKALARL-----------------------
A0A3M9Z6G6 EIDGKYDYRYSVLVFVLASLVREGWLQLSELEGLAADKLTKITALTRM-----------------------
K9YBC0 ELDGKYDDRESVLIFVFSQLVKEGWLSLEELDGLSSDKISKLKALGRM-----------------------
A0A433UT48 DIDGKYDYRYSVLVFVFARLLKEGWLNLEELEGLAPDKLKKVSALSRM-----------------------
U7QJA4 DIDGKYDHRDSLLIFTFAQLVKEGWLHLDELKGLDAEKISKVSVLTRM-----------------------
A0A0F5Y9U5 DIDGKYDHRDSLLIFTFAQLVKEGWLHLDELKGLDAEKISKVSVLTRM-----------------------
A0A1Z4VEJ2 QIDGKYDYRYSVLIFVFAQLVREGWLHIEDLKGLEVDKIAKVSALTRM-----------------------
A0A1D9GCB7 DIDGKYDYRYSSLIFVFARLLKEGWLDLEELKFLERDKLAKITALSRM-----------------------
A0A2T1LUR3 QIDGKYDYRYSVLLFVFAQLLKEGWLYLEDIQGLEREKVSKISALSRM-----------------------
A0A1S2A0M0 QIDGKYDYRYSVLIFVFAQLVREGWLHIKDLEGLEVDKIAKVSALTRM-----------------------
A0A0V7ZE40 DIDGKYDYRYSVLIFVFARLLKEKWLDMSDLEGLERAKLTKIAALTRM-----------------------
A0A0M0SM91 EIDGKYDYRYSVLIFVFARLVKEGWLHLDELKGLKTDKLTKIAALTRI-----------------------
D4TP59 QIDGKYDYRYSVLIFVFAQLVREGWLHIKDLEGLEVDKIAKVSALTRM-----------------------
A0A1C0V2J9 EIDGKYDYRYSVLIFVFARLIKEGWLHLDELQGLEKDKLTKVAVMTRM-----------------------
A0A1Z4T0E3 DIDGKYDYKYSVLIFVFARLLKEGWLHLDELEGLEKEKLKKVTALSRM-----------------------
A0A4D9CDV6 EIDGKYDYRYSVLIFVFARLVKEGWLHLDELKGLNTDKLTKITALTRI-----------------------
A0A4Q9J8L2 EIDGKYDYRYSVLIFVFARLVKEGWLHLDELKGLNTDKLTKITALTRI-----------------------
A0A1Z4JH45 EIDGKYDYRDSVLIFVFAQLVREKWLDLNELKGLAADKLAKISALVRM----------------G------
K9YRJ5 EIDGKYDDRESVLIFVFSQLVKEGWLSVEDLEGLNSDKIAKLNALAKM-----------------------
A0A2K2ZQ72 EIDGKYDDRESVLIFVFSQLVKEGWLSVEDLEGLNSDKIAKLNALAKM-----------------------
A0A0X8WUZ5 ALEGKYDYRYSVLIFVFAQLVQEGWLELHELEGLATDKLTKVSALTRM-----GC--------HF------
A0A3S1A3G2 EIEGKYDYQYSVLLFIFAELIKEGWLSLNELKGLDQDKLSKVAVLSRM-----------------------
A0A328IFN0 EIDGKYDYRYSVLIFVFARLVKEGWLHLDELKGLNTDKLTKITALTRI-----------------------
A0A1J1LVU6 NIDGKYDYEYSGLIFIFASLVKEGWLHLNELDGLNTNKLTKIAAIARI-----------------------
A0A2W4WJR2 ELDGKYDERESALLFVFADLLKAGWLSLDDLNGLDALKLSKITALTRL-----M-----------------
A0A2H6LAN6 EIDGKYEYRYSVLIFVFARLIKEGWLHLDELQGLEKDKLTKVAVMTRM-----------------------
A0A073CCR0 NIDGKYDYEYSGLIFVFASLVKDGWLHLNELDGLNTNKLTKIAAIARI-----------------------
A0A1J1L8A9 NIDGKYDYEYSGLIFVFASLVKDGWLHLNELDGLNTNKLTKIAAIARI-----------------------
A0A3F3KQN7 QIDGKYDYRYSVLIFVFAQLVREGWLHIKDLEGLEVNKIAKVSALTRM-----------------------
A0A1Z4GMR8 EIDGKYDYKYSVLIFVFARLIKEGWLHLDELQGLEKDKLTKVAVMTRM-----------------------
L8LTI6 DLDGKYDYRYSSLIFVFAQLLKQGWLTLEDLQGLTPEKLKKISALARM-----------------------
A0A140K3K4 EIDGKYDYDHSTLVFVFAQLLKQGWLHHEELKGLNPKTLSKISALARM-----------------------
L7EAR7 QIDGKYEYRYTSLIFVFAQLLKEGWLKLEDLNGLEKDKLAKIAALSRM-----------------------
A0A1Z4KIH9 EIEGKYDYQYSALLFVFAGLVKDGWLHVNELEGLSKDKLSKVSALARM-----------------------
A0A1U7JAL9 ELDGKYDDRESALLFVFSSLVKEGWLSLDELEGLDAAKLSKITALTRM-----F-----------------
A0A1T4ZE83 NIDGKYDYEYSGLIFIFASLVKEGWLDLNELDGLNTNKLTKIAAIARI-----------------------
K9XQR4 EIDGKYDYDHSTLVFVFAQLLKQGWLHHEELKGLNPKTLSKISALARI-----------------------
A0A1Z4UBY1 EIDGKYDYNYSVLVFVFATLIKQGWLHLDELKGLDQDKLTKIGSLSRM-----------------------
A0A1Z4HIH2 EIDGKYDYNYSVLVFVFATLIKQGWLHLDELKGLDQDKLTKIGSLSRM-----------------------
A0A1Z4N0W1 EIDGKYDYNYSVLVFVFATLIKQGWLHLDELKGLDQDKLTKIGSLSRM-----------------------
A0A0D6KMZ1 EIDGKYDYNYSVLVFVFATLIKQGWLHLDELKGLDQDKLTKIGSLSRM-----------------------
A0A1Z4M8H2 EIDGKYDYNYSVLVFVFATLIKQGWLHLDELKGLDQDKLTKIGSLSRM-----------------------
Q3M6D9 EIEGKYDYQYSALLFVFAGLVKDGWLHVNELEGLSKDKLSKVSALARM-----------------------
A0A1J1JFJ3 NIDGKYDYEYSGLIFVFASLVKDGWLHLNELDGLNTNKLTKIAAIARI-----------------------
A0A2A2TND2 DIDGKYDYRYSFLIFVFARLVKEEWLDINELQGLTKEKLAKILALSRM-----------------------
A0A0P4UQR5 EIDGKYDYQYSSLIFVFARLVREQWLSIDELEGLEAEKLAKISALVKM-----L-----------------
A0A2S6CUN5 ELDGKYDYRYSVLIFVFARLLNEGWLHINELEGLAKDKLIKIEALARM-----QN--------FN------
E0UDW5 QIDGKYDYQYSALIFVFAQLVKEGWLHLKDLEGLDQDKLAKIAALTRM-----------------------
A0A1J1KBR6 NIDGKYDYEYSGLIFVFASLVKDGWLNLNELDGLNTNKLIKIAAIARI-----------------------
A0A1Z4K8T5 EIDGKYDYNYSVLVFVFATLIKQGWLHLDELKGLDQDKLTKIGSLSRM-----------------------
B7K963 QLDGKYDHRDSVLIFVFAQLVKEGWLHLDDLKGLQPEKLAKITALTRM-----------------------
A0A2W4UCK8 EIDGKYDDRESFLMFTLSRLIKDGLIDLVDLSGLEPEKQSKVKILTRM-----------------------
A0A0T7BSY5 EIDGKYDYNYSVLIFVFATLVKQGWLHLEELKGLDKDKIAKIGSLARM-----------------------
B4VWS0 DIDGKYDYDYSALLFLFARLVKEEWLKLEDLSGLDQSKLAKINALAQM-----------------------
K9RT87 DIEGKYEDEYSVLIFVLARLVKEGWLLVEELKGLEEDKLTKVTVLARM-----------------------
A0A2Z5X0V7 EVDGKYDYRLPMLVFVFAGLVKDGWLSLSELEGLNPDKIAKISALARM-----------------------
A0A2T1DUP8 QVEGKYDYQYAALPFVFAGLVKDGWLHLQELEGLSKDKLAKINSLANM-----------------------
A0A0S3TXA8 EIDGKYDYRYSGLIFVFARLIKEKWLSIEELKGLETDKLAKISALIRM-----S-----------------
A0A1Q8ZGW6 EIDGKYDYSYPALLFVFATLVKQGWLHLDELTGLDKGKLAKIASLARM-----------------------
A0A2W4WBC1 EIDGRYDYRLSILVFVFAGLVKDGWLNINELEGLNTDKIAKISALACM-----------------------
B5W3T4 DIDGKYDYRDAASVFVLATLVKQGWLSLEELQVLGQDKLAKISALTRL-----------------------
H1W9V5 DIDGKYDYRDAASVFVLATLVKQGWLSLEELQVLGQDKLAKISALTRL-----------------------
A0A1Q4R1J2 YLDGKYDFHPESLIFIFAQLVKEGLLDMAELSGFSADKLSKIRVLT-------FM----------------
A0A261KR47 DLDGKYDSRNATVIFSLAGLVKEGWLNITELEGLDQEKITKVSAMTRM-----I-----------------
A0A3N6NTT1 DLDGKYDSRNATVIFALAGLVKEGWLKLGELEGLDKEKITKVSAMTRI-----I-----------------
L8N3N1 EVDGRYDYNLPMLVFVFAGLIKDGWITVNELEGLNSDKIAKIMALSYM-----------------------
A0A0D6AFD4 DLDGKYDARESMLIFTFAQLLKEGWISLEELHGLDQAKLAKVSSLSKI-----------------------
A0A251W9V1 DIEGKYEEDCSSLLFGLARLVKEGWLTGEELTGLSPDKRSKVSALARM-----------------------
K9P3P2 EIEGRFDFRLPGLLFVFASLVKDGLLQVEELEGLERDKLNKITAMSRM-----------------------
U5DP51 DIDGKYDREQPGLLFSLAQLVKEGWLQLDDLQELDPNKRAKVSALANM-----------------------
K9YKB0 DLDGKYDNREPMLVFTFAQLLKEGWINLEELTGLEKGKLAQISSLARM-----------------------
A0A1Z4RRJ7 EIDGKYHYDQTTIVFDFAKLVKEKWLSIEELTGLKPQIITKISVLARM-----------------------
A0A081GJB9 EIEGRFDFRLPGLLFVFASLVKDGLLQMEELEGLDREKLNKIAAMSRL-----------------------
K9EYX4 DIDGKYDDAEPSLAYILSRLIKDGWLDSSELEGLSTDKRAKVTILTRI-----------------------
A0A2T1EUP8 EIEGRFDFRLPGLLFVFASLVKDGLLQVEELEGLERDKLNKITAMSRM-----------------------
A3IGP3 NIDGKYDFRESASVFVLAQLVKEKWLTLDELTDLTPSTKAKVAALTKM-----S-----------------
A0A2T1C837 DIDGKYDYRYPVLLFVFARLVQEKWLDLSELDGLDREKLAKIASIAMM-----------------------
A0A563VQT7 EIDGKYSYNPSTIVFDFARLVKEGWLNLDELKGLKPEMLSKISALARM-----------------------
A0A4P7ZS06 IIEGRFDFRLDGILFVFASLVKDQLLEVEELDGLDAGKLAKIKAMALF-----------------------
A0A2W6ZCC4 EMDGKFDLRDSSLVFVFATLVKDGLLSVHELDGLDQEKLVKISALARM-----------------------
B1WY11 HIDGKYYSSDATSMFVLAQLVKEKWLTLDELTGLTPSTRAKVAALAKM-----S-----------------
A0A2P7MYD7 TIEGRFDFRLDGILFVFASLVKDSLLQLDELNGLEAEKLAKIVAMSRF-----------------------
K9PYV2 DLDGKYDFRSEARVFVLAQLAKEGWLEISELEGLSIDKLAKIEVLIST-----LM----------------
A0A2G4G0V8 TIEGRFDFRLDGILFVFASLVKDSLLQIDELNGLEAEKLAKILAMSRF-----------------------
A0A2P7EGI6 TIEGRFDFRPEGILFVFARLVKDELLKLSELDGLDKEKLTKIAAMARF-----------------------
A0A2T1CVE7 EIDGKYVYNFSTFVFDCATLVKEKWLYLDDLQGLKPEMLSKISALARM-----------------------
T2IGE2 NIEGKYDFGESTSVFVLAQLVKEKWLTLDELSDLTPSTRAKVAALAKM-----------------------
Q0I963 EIEGRMEFNHDTILFSLAEMMKRNLIEANDLQGLDPKKVSKIKAMSLF-----------------------
A0A1F4M1Z8 DIDGKYDYRYSQLELVFGRLLREKRIYEQDLNGIADEKLANILRIAEL-----------------------
A0A2D3WC42 EFDTKYDYRYSMLPILFACYIEEGLLSDDELDIFSKSIKEHIQETVKF-----RAMISS------LT---D
A0A1G3I7L1 DIESKYDYRYSQLELVFGRLLRERRIEEQDLNGLADEKLANILRIAGL-----------------------
A0A369VPE7 EIDEKYDFRYSQLIFLFANLLRGGSIQESELTALGEEKAKYIIGIANL-----------------------
A0A554TWD7 HIDTLFDYRYSQLTHVFAVLILEGYLDEASLAGLAEDKLDGIRRQVRW-----AQ-G--------------
A0A2H9VE27 EIDAMFDYRYSQLPLVFARLIREGHLDESLLAGLSEEKRELIRSFLAF-----AEK--------------G
A0A3M8EQ96 ATDNKYDYRYSVLVLVFARLVREGWLSAEELAGLGEEKLEKIRMIWKG-----YEAVAG-----R-R--AR
A0A4Y7BAW9 GIERKYDYRYSQLIWVFGNLLREGRIQEAQLTGLSEEKLDSIRRIATF-----------------------
A0A431JWH4 ELDERYDFRYSVLVFVFAGLLRRGLIDEAELAALGEGKAHLIAELAKM-----------------------
A0A2A3APY3 DLDRTFDYRYSQLTVVFATLIRQGYLDEDLLSGLSQEKREEIRRMLAW-----HK---------------G
A0A4R6ZZ89 AIDEKYDYRYSQLIFVFARLLGEKWIDEKDLHGLSAEKLQAIQYILS------R-----------------
A0A3R7X377 QYEGRMEFDFSNILFSLADMIKQKLIQYDDLNGLNEVKLSKIKAMSMF-----------------------
A0A3D6BAJ2 IIDSKYDYRYSQLIIVFGRLLSEGYLNEEDISELSEEKRDLIKKSTVN-----M-----------------
A0A3A4WJV3 EIDQIYDYRYSQLVMVFAILIKRGLLSIDELKGLSDDKLERIKKIKN------L-----------------
A0A0A0D309 HIDTLFDYRYSQLTFVFAAAIREGYMDESSLAGLSEEKLEPIRRLLRS-----WMEE--------------
M5EZQ5 KLDEMFDYRYSQLPFVFARLIREGYLDENLLVGLSDDKWKEIRSFLTW-----AAK--------------E
N6ZU45 ELDERYDFRYSVLVFVFAGLLRRGLIDEAELAALGEGKAHRIAELAKM-----------------------
A0A2G2MUL2 ELNGKYDYRYSQLMFVFAQLVRGGYLSLKELEPIGKEKQASIEKMVNF-----KG---F----ET------
A0A257CEQ6 EIDAKYDFRYSQLHMVFGKLLREGRIAEADIAGLSDDNLNKILRCAEF-----------------------
A0A011QSW1 QIDTKYDFRYSQLLIVFGRLLRENSIEEGDLSGLSDEKLRYVRSVASL-----------------------
A0A349A6I1 QTDEKYDYRYSVLLFVFARLFYEGWIADADLQGLSDDKIEAIRYLQTG-----SAGYEA-----------G
A0A1F4KH11 EIEQKYDYRYSQLILALARLVREGRIAEEQLHGLSEEKLSYIRHMVSL-----------------------
A0A286D3A8 EIDRKYDYRYSRLIGVFATLLREGRISEEQLQGLSEEKRCCIRRLASL-----------------------
A0A0R3BRH3 ELDEMFDYRYSQLPLVFARLIREQHLDEALLAGLSDEKRQVIRSILSL-----AE---------------R
A0A090D9H1 KIDQLFDYRYSQLIVVFGALIQEGYLDESQLSGLSDDKRAEIRHFLAW-----HAE--------------A
A0A2A6NNW4 EIGEMFDYRYSQLPLVFARLIREQHLDEALLAGLSDEKRRIIRSILSS-----AA---------------R
A0A451A0M9 ATDNKYDYRYSVLISVFGRLLGEGRIHATDIEGLGEDKLEQIRSIADF-----IRK--------------R
A0A1E7GB31 VTDQKYDFRYSVLLFVFARLICEGWVREEDLDGLSGKKLQEIRRIV-----ELISG--------------I
A0A109K0E2 EIDEMFDYRYSQLPLVFARLIREGYLDESLLAGLSDEKREIIRSFLTQ-----AAR--------------R
ISF6_RS26460 EIDRVYDFRYSQLIFVFARLVERGVLDMSELEGLAETKLAEIDYLVRG-----P----------D------
BM315_RS14195 EIDRKYDYRYSQLLFVFGQLIREERVQEAQLAGLSEEKLGYIRRSASL-----------------------
C515_RS0106090 EIDERFDYRYSRLIVLFGCLLGEGLIEEQELAGLAAGKIAEIRHIASF-----RQKSCT-----PVA---D
G518_RS0115970 EIDRKYDYRYSQLTFVFGYLLREGRIQEAQLTGLAEDRLSNIRLIASL-----------------------
Q363_RS23335 EIDRRYDYRYSILPLVFAQLLRDGRLTEDDLHGLGQEKLDLIRRASAI-----------------------
METSZ_RS0107510 ALDEKYDYRYSELILVFARLLSEKWIDEKDLNGLNPEKLQAIRNLLS------W-----------------
ALA01S_RS28355 TIDQKYDFRYSQLIIVFGRLVREGRIFMSDLAGLSEEKIQLIERVAAV-----------------------
CP49_RS18030 EIDETFDYRYSQLPLVFARLIREGRLDESLLSGLSEEKREIIRSFLAF-----AAK--------------G
MCON_RS15960 ETDEKYDCSYSLLLWVFSRLMVEGGISEDDLRCLMKALLTAHSTLKFDSGTQCARQGPPQSQRSR-QVRHS
B9O00_RS05055 ALEELLDFRYSQLPFVFARLIHEGHLDEAQLAGLAEEKLELVRSYLAL-----LRRR--------------
EJ076_27380 KIDRMFDYRYSQLLFVFPQLIRAGYLDENLLAGLSQDKLDAIRRDIAF-----AESRQ------------R
A4R29_20035 DIDRTFDYRYSQLLYVFTHLIRAGYLDEKLLAGLSQDKLDAIRRDLAF-----AAGRPA-----S-----G
A9K65_014685 DIDRTFDYRYSQLLYVFTHLIRAGCLDEKLLAGLSQDKRDVIRRDLAF-----AAGRLA-----S-----G
Mesci_2682 DIDRTFDYRYSQLLYVFTHLIRAGCLDEKLLAGLSQDKRDVIRRDLAF-----AAGRPA-----S-----G
MLTONO_2065 DIDRMFDYRYSQLIYVLAHLIRLGHLDEKLLAGLSQDKWDAIRRDLAF-----TARRSA-----S-----G
sS8_5658 AIDEKYDYRYSQLIFVFARLLGEKWIDEKDLHGLSAEKLQAIQYILS------G-----------------
EJ076_27380_1 KIDRMFDYRYSQLLFVFPQLIRAGYLDENLLAGLSQDKLDAIRRDIAF-----AESRQ------------R
UNDYM_5545 RIDAKYDYRYSRLPLLLAQLVFQNLVKREDLQKLSQDKLEIIDSLLEK-----DRNYFY-----END---E
FTW19_09195 RIDRDYDYRYSVLPIVFAGMIRSGRLTENDLHGIDPAKLDIIRRIASY-----------------------
BSY238_2201 YMGRKYEFRYSELISLFVLLRAEGWLDEADLAGLRDDKLTMIREGCAR-----WQRHFE-----CG----D
: : :
